1 **Genome-wide DNA methylation and multi-omics study of human**  
2 **chondrocyte ontogeny and an epigenetic clock analysis of adult**  
3 **chondrocytes**

4  
5 Arijita Sarkar<sup>1</sup>, Siyoung Lee<sup>1</sup>, Ruzanna Shkhyan<sup>1</sup>, Nancy Q. Liu<sup>1</sup>, Ben Van Handel<sup>1</sup>, Jenny  
6 Magallanes<sup>1</sup>, Youngjoo Lee<sup>1</sup>, Litao Tao<sup>2,3</sup>, Neil Segil<sup>2,3</sup>, Jason Ernst<sup>4,5,6,7,8,9</sup>, Steve  
7 Horvath<sup>10,11#</sup> and Denis Evseenko<sup>1,2,3#</sup>

8  
9 <sup>1</sup>Department of Orthopaedic Surgery, Keck School of Medicine of USC, University of Southern  
10 California (USC), Los Angeles, CA, 90033, USA.

11 <sup>2</sup>Department of Stem Cell and Regenerative Medicine, University of Southern California, Los  
12 Angeles, CA, 90033, USA.

13 <sup>3</sup>Eli and Edythe Broad Center, University of Southern California, Los Angeles, CA, 90033, USA.

14 <sup>4</sup>Department of Biological Chemistry, UCLA, Los Angeles, CA 90095, USA.

15 <sup>5</sup>Eli and Edythe Broad Center of Regenerative Medicine and Stem Cell Research at UCLA, Los  
16 Angeles, CA 90095, USA.

17 <sup>6</sup>Computer Science Department, University of California, Los Angeles, CA 90095, USA.

18 <sup>7</sup>Jonsson Comprehensive Cancer Center, University of California, Los Angeles, CA 90095, USA.

19 <sup>8</sup>Molecular Biology Institute, University of California, Los Angeles, CA 90095, USA

20 <sup>9</sup>Department of Computational Medicine, University of California, Los Angeles, CA 90095, USA

21 <sup>10</sup>Department of Biostatistics, Fielding School of Public Health, University of California, Los  
22 Angeles, CA 90095, USA.

23 <sup>11</sup>Department of Human Genetics, David Geffen School of Medicine, University of California, Los  
24 Angeles, CA 90095, USA.

25

26 # Corresponding authors

27

28

29

30

31

32

33

34

35

## 36 **Abstract**

37  
38 Articular chondrocytes undergo functional changes and their regenerative potential declines with  
39 age. Although the molecular mechanisms guiding articular cartilage aging is poorly understood,  
40 DNA methylation is known to play a mechanistic role in aging. However, our understanding of  
41 DNA methylation in chondrocyte development across human ontogeny is limited. To better  
42 understand DNA methylome changes, methylation profiling was performed in human  
43 chondrocytes. This study reveals association between methylation of specific CpG sites and  
44 chondrocyte age. We also determined the putative binding targets of STAT3, a key age-patterned  
45 transcription factor in fetal chondrocytes and genetic ablation of STAT3 induced a global genomic  
46 hypermethylation. Moreover, an epigenetic clock built for adult human chondrocytes revealed that  
47 exposure of aged adult human chondrocytes to STAT3 agonist, decreased epigenetic age. Taken  
48 together, this work will serve as a foundation to understand development and aging of  
49 chondrocytes with a new perspective for development of rejuvenation agents for synovial joints.

## 50 51 **Introduction**

52  
53 Tissue regeneration occurs widely in the animal kingdom<sup>1</sup>. However, regenerative potential varies  
54 greatly across animals. Invertebrates and phylogenetically lower vertebrates, such as  
55 salamanders and zebrafish, often possess a higher regenerative capacity, and are capable of  
56 regenerating substantial parts of their body<sup>2</sup>. In contrast, mammals have a very limited  
57 regenerative capacity. Articular chondrocytes have very limited potential for intrinsic healing and  
58 repair<sup>3</sup>. Loss and degradation of articular chondrocytes is a significant cause of musculoskeletal  
59 morbidity. With aging, the regenerative potential of chondrocytes decreases with significant  
60 changes in mechanical, structural, matrix composition, and surface fibrillation<sup>4</sup>. Although, the  
61 cellular and molecular mechanisms for chondrocyte regeneration are poorly understood, it is  
62 believed to be a cumulative combination of many molecular pathways.

63 Recent studies in this field have determined the importance of epigenetic regulation in mediating  
64 the process of aging<sup>5</sup>. DNA methylation is a crucial player for epigenetic regulation of aging<sup>6,7</sup>. It  
65 is a biochemical process characterized by gain of methylation at the fifth carbon of cytosines i.e.,  
66 5-methylcytosine and occurs predominantly in cytosines followed by guanine residues (CpG).  
67 DNA methylation has diverse roles in several mammalian developmental stages, including  
68 genomic imprinting and X-chromosome inactivation<sup>8</sup> and is mediated by DNA  
69 methyltransferases. Although CpG methylation across mammals is tissue-specific, nearly 70-80%  
70 of CpGs in the mammalian genome are methylated. Establishment and regulation of DNA

71 methylation is dynamic and varies considerably between different developmental stages and ages  
72 <sup>9</sup>. Although the mechanisms that drive changes in the methylome during aging are not well  
73 understood, but they have been attributed to environmental and spontaneous epigenetic changes  
74 <sup>10</sup>. Because DNA methylation changes are reversible, they are an attractive therapeutic target for  
75 aging. Previously, molecular markers like telomere length <sup>11</sup> and gene expression <sup>12</sup> were used to  
76 predict age across various tissues and organisms. However, with the advent of genome-wide  
77 methylation profiling, methylation pattern changes in CpG sites have been used to predict the  
78 biological age of individuals <sup>13</sup>. The dynamics of methylation in aging have impelled researchers  
79 to develop ‘epigenetic clocks’ as the new standard to accurately predict biological age <sup>14,15</sup>.  
80 However, the impact of DNA methylation on chondrocyte development across human ontogeny  
81 has not been studied to date.

82 STAT3 is a well-known master transcriptional factor that exhibits a repertoire of signaling  
83 pathways in various tissues and contexts <sup>16,17</sup>, including self-renewal, proliferation, and  
84 pluripotency <sup>18,19</sup>. STAT3 also regulates chromatin accessibility via DNA methyltransferases <sup>20,21</sup>  
85 and histone modifiers <sup>22</sup>. Our recent studies have shown that STAT3 is highly activated in  
86 developing fetal chondrocytes <sup>23</sup>. Moreover, the levels of active phosphorylated STAT3 (pSTAT3)  
87 are higher in fetal as compared to adult chondrocytes <sup>23</sup>. However, the binding targets of STAT3  
88 in human chondrocyte ontogeny and their potential role in maintaining the immature phenotype  
89 of fetal chondrocytes via epigenetic regulation has not been explored.

90 Thus, in this work, we study the dynamic genome-wide methylation profile of human chondrocytes  
91 across ontogeny. We have determined correlation between methylation of specific CpG sites and  
92 chondrocyte age. We also investigate the enrichment of chromatin states in these age-correlated  
93 CpGs. Besides, we also explored the putative binding targets of STAT3, a key age-patterned TF  
94 in fetal chondrocytes along with impact of STAT3’s genetic manipulation on genome-wide DNA  
95 methylation. Moreover, we apply a novel epigenetic clock for adult human chondrocytes that  
96 accurately predicts epigenetic age. We utilized this clock to gain further insight into the effect of a  
97 small molecule STAT3 agonist in decreasing epigenetic age of aged adult chondrocytes. In a  
98 nutshell, these findings will serve as a foundation to understand the global DNA methylation profile  
99 of human chondrocytes and help develop new therapeutic interventions to reverse or slow down  
100 aging.

101

102

103

104

105

## 106 **Results**

107

### 108 **Epigenome-wide association study (EWAS) identifies age-correlated CpGs in non-cultured** 109 **human fetal and adult chondrocytes**

110

111 We performed DNA methylation profiling for non-cultured human fetal (n=8) and adult  
112 chondrocytes (n=22) and identified regulatory genes associated with ontogeny specification. The  
113 DNA methylation  $\beta$ -values across all samples (**Fig 1a**) from 865,859 CpG sites follows a bimodal  
114 distribution with peaks around 0 (unmethylated) and 1 (methylated). Evaluation of global  
115 methylation patterns (hypomethylation and hypermethylation) across the ontogeny revealed  
116 correlation with chondrocyte age (**Table S1**). Further site-specific genome-wide pattern of DNA  
117 methylation (**Fig 1b-c**) showed a predominant proportion of age-correlated CpG sites to be  
118 statistically significant ( $p$ -value<0.05). These CpGs showing either gain or loss of methylation  
119 across ages (i.e., hypermethylated or hypomethylated respectively) were not evenly distributed  
120 across the genome, showing prevalence in open sea regions and mostly confined in the gene  
121 body (**Fig 1d**). Several chondrocyte-associated genes including UCMA, SOX11, BMPR1B,  
122 CSPG4, COL2A1, ITGA10, COL9A1, and RUNX2 are known to be expressed during  
123 development <sup>24</sup>. We thus explored the methylation level for all age-correlated CpG probes  
124 associated with these chondrogenic genes (**Fig S1**). Our data suggests that with aging, age-  
125 correlated CpGs associated with chondrogenic genes gain methylation (**Fig 1e**) and show  
126 expression downregulation as revealed by the transcriptomic <sup>24</sup> and single cell sequencing data  
127 <sup>25</sup> for non-cultured fetal and adult chondrocytes (**Fig 1f-g**). Besides, age-correlated CpGs losing  
128 methylation with age and the transcriptional profile for the associated genes has been shown in  
129 **FigS2-3**. We also examined the methylation status of all age-correlated CpG probes associated  
130 with microRNA (miRNA) genes (**Fig S4**), which are known to play an important role in  
131 chondrocytes during development <sup>26-29</sup>. The age-correlated CpGs for these miRNAs also gain  
132 methylation with age and show downregulation in adult chondrocytes as revealed by the miRNA-  
133 sequencing data (**Fig 1h-i, Table S2**). miRNAs associated with age-correlated CpGs losing  
134 methylation with age has been shown in **FigS5**. Overall, age-correlated CpGs, show a distinct  
135 methylation profile in fetal and adult chondrocytes, which in turn governs the ontogeny-specific  
136 phenomenon of development.

137

### 138 **Age-correlated CpGs are associated with distinct chromatin signatures**

139

140 It has been previously reported that DNA methylation patterning is governed by various chromatin  
141 states such as histone modifications, and nucleosome positioning <sup>30</sup>. Additionally, various

142 chromatin remodeling factors might interact with DNA methyltransferases, guide them to specific  
143 DNA sequences and modulate transcriptional activation/repression. A closer inspection into the  
144 genes associated with the age-correlated CpGs revealed enrichment of Gene Ontology terms  
145 involving binding and activity of several histone modifiers including enhancer-mediated binding  
146 (**Fig 2a**). Thus, we hypothesized that age-correlated CpGs might be associated with distinct  
147 chromatin states in chondrocytes. Accordingly, we determined the chromatin states associated  
148 with age-correlated CpGs (i.e. both hypermethylated(204549 CpGs) and hypomethylated(132383  
149 CpGs)) in fetal and adult chondrocytes using the ChromHMM chromatin state model previously  
150 generated by our group<sup>24</sup> based on data from four histone modifications (H3K4me3, H3K27me3,  
151 H3K4me1, and H3K27ac)(**Fig 2b**). We observed that CpGs in fetal chondrocytes, which gain  
152 methylation with age, show stronger enrichment for a poised promoter or bivalent state,  
153 characterized by the co-existence of both activating (H3K4me3) and repressing (H3K27me3)  
154 marks. Interestingly, bivalent chromatin states has been previously known to be enriched in  
155 developmentally important genes<sup>31</sup>. Besides CpGs in adult chondrocytes, which lose methylation  
156 with age are most enriched for the active enhancer chromatin state suggestive of transcriptional  
157 regulation from these regions. Of note, gain or loss of methylation in CpGs correlated with age in  
158 both fetal and adult chondrocytes show enrichment for chromatin states associated with  
159 enhancers (marked by H3K27ac) which might indicate the previously known fact that  
160 chondrocytes acquire cell-type-specific enhancers upon differentiation<sup>32</sup>. We further investigated  
161 the chromatin state for the chondrogenic genes mentioned previously in Fig 1e and closer  
162 inspection of these loci demonstrate presence of active histone modifications characterized by  
163 presence of H3K27ac while H3K27me3 repressive mark is mostly absent (**Fig 2c**). Taken  
164 together, these findings affirm that age-correlated CpGs are intrinsically tied to chromatin state  
165 and corroborate with regulation of chondrogenic genes as shown previously using methylation  
166 and transcriptomic data for fetal and adult chondrocytes.

167

### 168 **Genome-wide putative STAT3 targets differ in development and disease**

169

170 STAT3 exhibits a plethora of functions with context-specific roles in skeletal development,  
171 inflammation, and neoplastic growth<sup>33</sup>. It is also involved in regulating methylation of CpGs sites  
172 by interacting with DNA methyltransferases<sup>20</sup>. Also as mentioned previously our lab has observed  
173 STAT3 to be highly expressed in fetal chondrocytes in comparison to healthy adults<sup>23</sup>. Besides,  
174 pSTAT3 is also highly expressed in osteoarthritic chondrocytes in comparison to healthy adults  
175 (**Fig S6**). Hence, it is quite evident that although STAT3 is highly expressed in fetal and  
176 osteoarthritic chondrocytes when compared to healthy adults, the outcomes downstream of

177 STAT3 are different in each context. This led us to hypothesize that STAT3 has different context-  
178 specific transcriptional targets that differ in development and disease.

179 To gain further insight into the context-specific putative targets of STAT3, we performed  
180 Cleavage Under Targets and Release Using Nuclease (CUT&RUN)<sup>34</sup> profiling for fetal, adult, and  
181 osteoarthritic chondrocytes (n=2 for each case). The average profile plot for peaks shows binding  
182 around the transcription start site (TSS) and extending to genic regions with confidence intervals  
183 shown by the shadows following each curve. Confidence intervals were estimated by bootstrap  
184 method using 500 iterations (**Fig 3a**). Heatmaps centered around the peak summits shows  
185 enrichment of reads (**Fig 3b**). Most of the STAT3-binding sites were located in the distal intergenic  
186 regions, suggesting STAT3 might regulate the expression of its putative targets by binding to  
187 distal regulatory elements (**Fig 3c**). Interestingly, epigenetic regulation mediated by STAT3 via  
188 binding to intergenic regions has been reported previously<sup>35,36</sup>. Further, gene enrichment analysis  
189 for putative STAT3 binding targets revealed distinct pathways and molecular functions regulated  
190 in fetal and adult chondrocytes (**Fig 3d**). For instance, the Wnt signaling pathway, which is  
191 enriched in fetal chondrocytes, is known to maintain an immature phenotype by regulating self-  
192 renewal and pluripotency in human pluripotent stem cells<sup>24,37</sup>. In contrast, enrichment of  
193 extracellular matrix (ECM) receptor interaction in adult chondrocytes is suggestive of the gradual  
194 degradation of ECM with age<sup>38</sup>. We next identified the enriched DNA motifs present in the putative  
195 STAT3 targets for both fetal and adult chondrocytes (**Fig 3e**). For fetal chondrocytes, we obtained  
196 motifs from several well-known and important transcription factors known to modulate early  
197 development, including SOXs (SOX4, SOX6)<sup>39</sup> and LEF1<sup>40</sup>. Similar analysis for adult  
198 chondrocytes showed enrichment for GATA1, GATA2, IRF4, GLI3, CTCF binding motifs.  
199 Although the role of these genes in chondrocytes remains unclear, these transcription factors are  
200 known to be essential for differentiation and lineage commitment in different cell types<sup>41-45</sup>. To  
201 date, researchers have uncovered several STAT3 binding targets across various other tissues  
202 and cell types. Since STAT3 binding targets have not been studied in human chondrocytes, we  
203 were interested in exploring the exclusive putative binding targets in human chondrocytes. Thus  
204 we overlapped the STAT3 targets reported till date in ChIP-Atlas<sup>46</sup> and CistromeDB<sup>47,48</sup> with our  
205 analysis (**Fig 3f**). Interestingly, we obtained 1858 exclusive targets in human chondrocytes (**Table**  
206 **S3**).

207 We overlapped the putative binding targets obtained for fetal and adult chondrocytes and  
208 determined targets exclusively present in fetal chondrocytes. To evaluate the concordance  
209 between these fetal chondrocyte exclusive 5268 putative STAT3 targets and gene expression  
210 (**Fig 3g**), we compared them to transcriptomics data from i) fetal and adult chondrocytes<sup>24</sup> and ii)

211 STAT3 knocked down fetal chondrocytes<sup>49</sup>. We also performed ATAC-seq on fetal  
212 chondrocytes(n=3) (**Fig S7**) to check for chromatin accessibility. We obtained 6 well-known genes  
213 (ACAN, COL16A1, COL27A1, COL2A1, DUSP7, KCNS1) which had putative open chromatin  
214 regions. Interestingly, COL2A1 which is a key structural gene and plays a critical role in matrix  
215 anabolism was shown to have gained methylation with age (**Fig 1e, Fig S1**). Upon a similar  
216 analysis with 1812 exclusive putative STAT3 targets in adult chondrocytes, we finally obtained 21  
217 of them to be overlapping with transcriptomics data from adult chondrocytes (**Fig 3h**). Of these,  
218 CD14 and TLR1 have been shown to be losing methylation with age (**Fig S2-3**).

219 Next, we assessed the role of STAT3 in disease by determining the putative binding partners in  
220 osteoarthritic chondrocytes by CUT&RUN and comparing them to those in development. As  
221 mentioned previously, STAT3 might regulate chondrocyte development and disease by binding  
222 to different partners dependent on context. The profile for osteoarthritic chondrocytes (**Fig S8a-**  
223 **c**) shows binding mostly in the distal intergenic region. We do observe that different pathways are  
224 regulated by STAT3 in the context of disease and development (**Fig S8d**). On motif analysis for  
225 the putative STAT3 binding sites we obtained DNA motif for NF- $\kappa$ B, which is a well-known  
226 transcription factor that mediates inflammation (**Fig S8e**). Recently, Wang et al. have  
227 demonstrated that STAT3 can speed up osteoarthritis through the NF $\kappa$ B signaling pathway<sup>50</sup>.  
228 Other transcription factors that might regulate osteoarthritis via co-binding to STAT3 include  
229 TGIF1, JUNB, FOSL2 and FOXO1, mostly known for their role in inflammation<sup>51-54</sup>. We next  
230 overlapped the putative targets obtained from fetal chondrocytes and osteoarthritic chondrocytes  
231 and determined the exclusive targets in disease. Of these 84 exclusive binding partners in  
232 disease, 16 targets were highly expressed in osteoarthritis in comparison to fetal chondrocytes  
233 as suggested by single cell sequencing data (**Fig S8f**). Thus, combinatorial analysis of this data  
234 provides critical insight into the multipotential, and context-specific mode of regulation exhibited  
235 by STAT3 during development and disease.

### 236 **Genetic manipulation of STAT3 induces global hypermethylation in fetal chondrocytes**

237  
238  
239 Our lab has previously shown that STAT3 is essential for normal cartilage development and is  
240 highly expressed in anabolic fetal chondrocytes compared to healthy adult chondrocytes<sup>23</sup>.  
241 Recently we have also shown that postnatal STAT3 deletion in 3-months-old mice lead to  
242 degradation of the growth plate<sup>49</sup>. Moreover, upon STAT3 inhibition, an increase in apoptosis  
243 and decrease in proliferation was observed<sup>23</sup>. In summary, STAT3 plays a predominant role in  
244 chondrogenesis, and its deletion leads to profound changes in early development. Thus, we  
245 hypothesized that genetic manipulation of STAT3 in fetal chondrocytes might have an impact on

246 genome-wide DNA methylation. We transduced fetal chondrocytes with STAT3 shRNA (n=4) and  
247 scrambled (n=4) (**Fig S9**) and performed DNA methylation profiling. To understand the effect of  
248 STAT3 inhibition, we determined the differentially methylated CpGs. Density and volcano plots  
249 for the CpG sites suggested that 55697 CpGs are statistically significant ( $p$ -value<0.05) (**Fig 4a-**  
250 **b**). Interestingly, we found a significant number of CpGs have gained methylation  
251 (hypermethylated) in STAT3 knocked down fetal chondrocytes (**Fig 4c**). We strengthened our  
252 observation by looking into differentially methylated CpGs, that are correlated with age (**Fig 4d**).  
253 These CpG sites were unevenly distributed across the genome, and they were prevalent in the  
254 open sea region (**Fig 4d**). Differentially methylated CpGs which are age-correlated as well  
255 showed a significant increase in hypermethylation across the genome (**Fig 4e**). Furthermore, we  
256 explored the concordance between genes associated with differentially methylated CpGs that  
257 gain methylation with age and transcriptomic data from i) fetal chondrocytes <sup>24</sup> and ii) STAT3  
258 knocked down fetal chondrocytes <sup>49</sup> as well as STAT3 binding targets determined previously (**Fig**  
259 **4f**). In summary, it can be concluded that upon STAT3 inhibition in fetal chondrocytes there is a  
260 global gain in methylation that might attribute to epigenetic aging of these cells.

261

## 262 **A novel epigenetic clock for adult chondrocytes helps to accurately predict STAT3 agonist-** 263 **induced global hypomethylation**

264

265 Since the late 1960s, a vast majority of literature describes DNA methylation levels as having  
266 strong effects on the aging of tissues and cells <sup>55,56</sup>. DNA methylation based epigenetic clocks are  
267 the best biological age predictors till date <sup>57</sup>. Several epigenetic clocks have been developed for  
268 various tissues across several species <sup>13</sup>. To the best of our knowledge, we for the first time, have  
269 developed a novel epigenetic clock that is specific to human adult chondrocytes (**Fig 5a**). This  
270 clock utilizes DNA methylation data to estimate biological age of human adult chondrocytes with  
271 high accuracy ( $r=0.97$ ,  $p$ -value= $2.4E-14$ ). Further, we used this novel clock to accurately predict  
272 epigenetic age of adult chondrocytes upon treatment with a STAT3 agonist.

273 Our lab previously performed a high throughput screening of 170,000 compounds and identified  
274 a small molecule which acts as a STAT3 agonist in adult chondrocytes, thereby reducing cartilage  
275 degeneration and structural damage <sup>23</sup>. This small molecule increased proliferation while reducing  
276 apoptosis and hypertrophic responses in adult chondrocytes *in vitro*. Besides, this molecule was  
277 shown to promote cartilage repair in a rat osteochondral defect model with spontaneous healing  
278 in 4 weeks <sup>23</sup>. Moreover, we have also shown that this compound plays a role in hair follicle stem  
279 cell activation via STAT3 <sup>58</sup>. Hence, to gain further insight into the mechanism, we treated adult



280 chondrocytes with or without STAT3 agonist for 2 weeks (n=6) and performed DNA methylation  
281 profiling. We hypothesized that treatment of adult chondrocytes with STAT3 agonist would make  
282 adult chondrocytes epigenetically younger. Interestingly, based on the novel clock, adult  
283 chondrocytes from 5 out of 6 tested donors showed a clear decrease in epigenetic age upon  
284 treatment for 2 weeks (**Fig 5b**). Thus, to strengthen our results, we determined the differentially  
285 methylated CpGs between 2 weeks cultured, treated and untreated samples and observed a  
286 global hypomethylation in treated samples (**Fig 5c**). We also evaluated the differentially  
287 methylated CpGs, which are age-correlated, and obtained global hypomethylation in treated  
288 samples (**Fig 5d**). Taken together these results suggest that pharmacological activation of STAT3  
289 signaling in aged adult chondrocytes reduces their epigenetic age. These proof-of concept studies  
290 open a new perspective for development of rejuvenation agents for synovial joints.

291

## 292 **Discussion**

293

294 Articular chondrocyte development and differentiation is governed by cell-specific gene  
295 expression patterns, which is in turn established and reinforced by DNA methylation<sup>59</sup>. Here we  
296 generated a DNA methylation profile for human chondrocytes across ontogeny and determined  
297 the epigenome-wide changes in the methylome of fetal and adult chondrocytes. We showed  
298 association between methylation of CpG sites and chondrocyte age. Moreover, these age-  
299 associated CpGs are mainly confined to the open sea and gene body regions showing the distinct  
300 pattern of epigenetic regulation in chondrocytes. A closer inspection into the methylation pattern  
301 revealed gain of methylation with age in CpGs associated with chondrogenic genes. These  
302 observations were in concordance with upregulation of chondrogenic gene expression in fetal  
303 chondrocytes transcriptomics data as well as single cell sequencing data when compared to adult  
304 chondrocytes. We also found CpGs losing methylation with age and genes associated with these  
305 CpGs showed upregulation in adult chondrocytes. miRNAs are known to play a key role in  
306 regulating chondrocyte development and homeostasis with age<sup>60</sup>. In mammalian cells, DNA  
307 methylation is known to direct miRNA biogenesis<sup>61</sup>. Hence, regulating expression of miRNAs by  
308 modulating DNA methylation may also act as a novel therapeutic strategy for chondrocyte repair  
309 and regeneration. We also observe gain of methylation in age-correlated CpGs for miRNAs known  
310 to be involved in chondrocyte homeostasis. Moreover, interrogation of the chromatin states for  
311 the age-correlated CpGs provided a clue towards enrichment of bivalent promoters during  
312 development. Enhancer chromatin states were also enriched across ontogeny providing a clue  
313 towards the region of transcriptional regulation.

314 STAT3, a key transcriptional factor, has been previously known to be involved in regulating  
315 stemness, development, and regeneration of tissues and organs. We have previously reported  
316 that STAT3 is highly expressed in anabolic fetal chondrocytes<sup>23</sup> and its involvement in  
317 chondrocyte development. Here, we observe that putative binding targets of STAT3 in fetal and  
318 adult chondrocytes are different and they are associated with distinct signaling pathways. We  
319 compared our results with transcriptomic data from fetal chondrocytes<sup>24</sup>, STAT3 knocked down  
320 fetal chondrocytes<sup>49</sup> and chromatin accessibility data and found well known genes including  
321 ACAN, COL16A1, COL27A1, COL2A1, DUSP7, and KCNS1 to be the putative targets. Of these,  
322 age-correlated CpGs associated with COL2A1 was shown to gain methylation with age. In adult  
323 chondrocytes, of the 21 putative STAT3 targets, TLR1 and CD14 associated age-correlated CpGs  
324 were shown to lose methylation with age. STAT3 being a pleiotropic factor, regulates its targets  
325 in a context-specific manner. Thus, we also determined STAT3 targets in disease i.e.,  
326 osteoarthritic chondrocytes and compared them to targets in development. In a nutshell, we  
327 observed the change in milieu of putative STAT3 targets in development and disease. Moreover,  
328 the critical role of STAT3 in development intrigued us to understand its effect in modulating DNA  
329 methylation. Genetic manipulation of STAT3 in fetal chondrocytes, induced a global  
330 hypermethylation, indicative of its role in maintaining an immature phenotype in chondrocytes.  
331 The most challenging task in the field of aging is to determine a valid and reliable age predictor  
332 that will help understand how to slow, halt or even reverse aging<sup>62</sup>. 'Epigenetic clocks' are  
333 accurate DNA methylation age estimators, which are built by regressing a transformed version of  
334 chronological age on a set of CpGs using a supervised machine learning model<sup>13</sup>. In this study,  
335 we applied an epigenetic clock that is tailor-made for adult human chondrocytes and will be  
336 extremely useful in accurately estimating epigenetic age of adult chondrocytes. Our previous work  
337 has shown the importance of a small molecule STAT3 agonist that promotes cartilage repair and  
338 increases proliferation of chondrocytes<sup>23</sup>. We used this chondrocyte clock, to explore the impact  
339 this small molecule has on epigenetic age in aged adult articular chondrocytes. Interestingly, we  
340 observed a decrease in epigenetic age in treated cells with a global hypomethylation in the  
341 genome.

342 In summary, the data presented here will serve as a foundation to understand the complex  
343 regulation of the epigenome across human chondrocyte ontogeny. Besides, it also provides  
344 strong evidence for the crucial role of STAT3 in modulating the epigenome during chondrocyte  
345 development. The novel epigenetic clock presented here will help researchers to capture pivotal  
346 aspects of biological age in adult chondrocytes. We anticipate this work will shed light towards  
347 chondrocyte aging with newer perspectives for development of rejuvenation agents.

348

## 349 **Methods**

350

### 351 **Chondrocyte sample collection**

352

353 Fetal tissue samples (14wks-19wks) were obtained from Novogenix Laboratories. All donated  
354 material was anonymous, carried no personal identifiers and was obtained after informed consent.

355 Sex of the specimens was unknown. Adult human primary (21yrs-87yrs) and osteoarthritic tissue

356 samples (55-60yrs) were obtained from National Disease Research Interchange (NDRI). Primary

357 tissues were manually cut into small pieces and digested for 4–16 h at 37 °C with mild agitation

358 in digestion media consisting of DMEM (Corning) with 10% FBS (Sigma), 1 mg/mL dispase

359 (Gibco), 1 mg/mL type 2 collagenase (Worthington), 10–µg/mL gentamycin (Teknova) and

360 primocin (Invivogen).

361

### 362 **Cell culture and treatments**

363

364 Only early passages of fetal and adult chondrocytes (P0) were used for experimentation to avoid

365 de-differentiation and loss of cartilage phenotype<sup>63</sup>. Fetal and adult chondrocytes were cultured

366 in DMEM F12 medium containing 10% (vol/vol) fetal bovine serum and 1% Penicillin-Streptomycin

367 (vol/vol) at 37 °C in a humidified atmosphere of 95% air and 5% CO<sub>2</sub>. Media was replenished

368 with DMEM F12 medium containing 1% (vol/vol) fetal bovine serum and 1% Penicillin-

369 Streptomycin (vol/vol) once treatments were added.

370 Fetal chondrocytes were transduced with doxycycline inducible STAT3 shRNA or scrambled

371 lentiviral particles (Dharmacon) and treated with Doxycycline every 48hrs. After 4 weeks of

372 infection, transduced cells were sorted for RFP fluorescence.

373 Aged adult chondrocytes (55yrs-87yrs) were treated with or without a modified form of the small

374 molecule STAT3 agonist, RCGD 423F N-(4-Fluorophenyl)-4-phenyl-2-thiazolamine; synthesized

375 and provided by J-STAR Research at 10µM for 2weeks.

376

### 377 **FACS**

378 FACS for fetal chondrocytes transduced with STAT3 shRNA or scrambled was performed on a

379 BD FACSAria IIIu cell sorter. Cells were washed in 1% FBS and stained with DAPI for viability.

380 Populations of interest based on DAPI negativity expression and RFP expression were directly

381 sorted into DMEM/F12 containing 10% FBS with 1% P/S/A.

382

### 383 **RNA extraction and quantitative Real-Time PCR**

384  
385 Total RNA was extracted from live sorted fetal chondrocytes transduced with STAT3 shRNA or  
386 scrambled using the RNeasy Mini Kit (Qiagen). 500 ng of RNA was reverse transcribed using the  
387 Maxima First Strand cDNA Synthesis Kit (Thermo Fisher). Power SYBR Green (Applied  
388 Biosystems) RT-PCR amplification and detection was performed using an Applied Biosystems  
389 Step One Plus Real-Time PCR machine. The comparative Ct method for relative quantification  
390 ( $2^{-\Delta\Delta Ct}$ ) was used to quantitate gene expression, where results were normalized to Rpl7  
391 (ribosomal protein L7). Primer sequences are available upon request. Results were analyzed  
392 using 2-tailed Student's t test in GraphPad Prism 9.0.

393

#### 394 **Genomic DNA extraction**

395  
396 Genomic DNA was extracted using QIAGEN DNeasy® Tissue kit or QIAamp® DNA Micro Kit  
397 depending on the starting number of cells. For DNeasy® Blood or Tissue kit samples were first  
398 lysed using Proteinase K. Lysate was loaded into the DNeasy Mini spin column and centrifuged  
399 to selectively bind DNA to the DNeasy membrane as contaminants pass through. Subsequent  
400 washing steps remove remaining contaminants and enzyme inhibitors. For QIAamp® DNA Micro  
401 Kit samples were lysed under high denaturing conditions at elevated temperatures in the  
402 presence of Proteinase K and Buffer ATL. Buffer AL was added to lysates followed by loading  
403 into QIAamp MinElute column and centrifugation. Residual contaminants or inhibitors are washed  
404 off using first Buffer AW1 and then Buffer AW2. Purified genomic DNA from either kit was eluted  
405 in water and quantified by Nanodrop confirming for high 260/280 purity ratio.

406

#### 407 **DNA methylation data**

408  
409 The Illumina Infinium Methylation EPIC BeadChip array was used to perform DNA methylation  
410 profiling. This platform measures bisulfite conversion-based, single-CpG-resolution DNA  
411 methylation levels at 866,836 CpG sites in the human genome. Methylation levels are quantified  
412 by  $\beta$  values which is the ratio of intensities between methylated (signal A) and un-methylated  
413 (signal B) alleles. Specifically, the  $\beta$  value is calculated from the intensity of the methylated (M  
414 corresponding to signal A) and un-methylated (U corresponding to signal B) alleles, as the ratio  
415 of fluorescent signals  $\beta = \text{Max}(M,0)/[\text{Max}(M,0) + \text{Max}(U,0) + 100]$ . Thus,  $\beta$  values range from 0  
416 (completely un-methylated) to 1 (completely methylated)<sup>64</sup>.

417

#### 418 **Analysis of Infinium EPIC methylation data**

419

420 The R package “minfi” was used for analysis of the data <sup>65,66</sup>. Raw IDAT files were read and  
421 preprocessed and probes with high detection p-value ( $p\text{-value}>0.05$ ) and potential SNP  
422 contamination were filtered. Normalization of data was done using the preprocessFunnorm  
423 function to generate Beta values per probe. Beta values provide the percentage of CpG  
424 methylation per probe with 0 being unmethylated and 1 fully methylated. Differentially methylated  
425 probes were identified by dmpFinder in logistic regression mode for appropriate contrasts followed  
426 by statistical analysis using an empirical Bayes method and then filtered by significance threshold  
427 ( $p\text{-value}<0.05$ , F-test). Annotation of probes was performed with the R  
428 package ‘IlluminaHumanMethylationEPICanno.ilm10b4.hg19’ version 0.6.0 for hg19 genome  
429 build. For EWAS approach <sup>55,56,67</sup>, the DNA methylation changes were examined for association  
430 with chondrocyte age using the function "standardScreeningNumericTrait" from the "WGCNA" R  
431 package <sup>68</sup>.

432

### 433 **DNA methylation age and Epigenetic clock**

434

435 The chondrocyte clock was developed using both novel and existing methylation data from  
436 chondrocytes, cartilage and bone (Horvath 2021, in preparation). The age was regressed on DNA  
437 methylation levels using elastic net regression as implemented in the R function glmnet. The  
438 epigenetic clock for bones is described in separate article (Horvath 2021, in preparation).

439

### 440 **Bulk-RNA sequencing data analysis**

441

442 Reads were aligned to human genome (hg19) using STAR aligner <sup>69</sup>. Normalization was done  
443 using counts per million (CPM) method. Transcript levels were quantified to the reference using  
444 Partek E/M (build version 10.0.21.0210) with default parameters. Genes were considered to be  
445 differentially expressed based on fold change $>1.5$  and  $p\text{-value}<0.05$ . Gene set enrichment  
446 analysis was performed by Enrichr <sup>70-72</sup> using Fisher’s exact test ( $p\text{-value}<0.05$ ). The background  
447 for enrichment was a lookup table of expected ranks and variances for each term in the library.  
448 These expected values were precomputed using Fisher's exact test for many random input gene  
449 sets for each term in the gene set library.

450

### 451 **miRNA-sequencing and analysis**

452

453 RNA was isolated using miRNeasy Micro Kit (Qiagen) according to manufacturer’s protocol.  
454 Briefly, samples were lysed by QIAzol lysis reagent followed by addition of chloroform and  
455 centrifugation to separate the solution into phases. The upper aqueous phase was extracted,

456 ethanol was added, and samples were loaded into RNeasy MinElute spin column. Thereafter a  
457 specialized protocol was used to separate the enriched miRNA fraction. miRNA was quantified  
458 using Qubit fluorometer, and run on Agilent Bioanalyzer 2100 for quality control. Libraries were  
459 prepared using NEBNext Multiplex Small RNA Library Prep Set (Illumina) according to the  
460 manufacturer's protocol. The workflow consists of adapter ligation, cDNA synthesis, PCR  
461 enrichment, clean up and size selection. Different adapters were used for multiplexing samples  
462 in one lane. Sequencing was performed on Illumina HiSeq 2500 with single-end 50 base pair  
463 reads. Reads were aligned to human genome (hg38) using Bowtie <sup>73</sup>. Normalization was done  
464 using counts per million (CPM) method and miRNAs levels were quantified (miRBasev22). A  
465 lognormal with shrinkage model was used for differential expression analysis. miRNAs were  
466 considered to be differentially expressed based on fold change>1.5 and p-value<0.05.

467

### 468 **Single-cell sequencing using 10X Genomics**

469

470 Single cell samples were prepared using Single Cell 3' Library & Gel Bead Kit v2 and Chip Kit  
471 (10X Genomics) according to the manufacturer's protocol. Briefly samples were FACS sorted  
472 using DAPI to select live cells followed by resuspension in 0.04% BSA-PBS. Nearly 1,200 cells/ $\mu$ l  
473 were added to each well of the chip with a target cell recovery estimate of 8,000 cells. Thereafter  
474 Gel bead-in Emulsions (GEMs) were generated using GemCode Single-Cell Instrument. GEMs  
475 were reverse transcribed, droplets were broken and single stranded cDNA was isolated. cDNAs  
476 were cleaned up with DynaBeads and amplified. Finally, cDNAs were ligated with adapters, post-  
477 ligation products were amplified, cleaned up with SPRIselect. Purified libraries were submitted to  
478 UCLA Technology Center for Genomics & Bioinformatics for quality check and sequencing. The  
479 quality and concentration of the purified libraries were evaluated by High Sensitivity D5000 DNA  
480 chip (Agilent) and sequencing was performed on NextSeq500.

481

### 482 **10X sequencing data analysis**

483

484 Raw sequencing reads were processed using Partek Flow Analysis Software (build version  
485 10.0.21.0210). Briefly, raw reads were checked for their quality and trimmed. Reads with an  
486 average base quality score per position >30 were considered for alignment. Trimmed reads were  
487 aligned to the human genome version hg38-Gencode Genes- release 30 using STAR -2.6.1d with  
488 default parameters. Reads with alignment percentage >75% were de-duplicated based on their  
489 unique molecular identifiers (UMIs). Reads mapping to the same chromosomal location with  
490 duplicate UMIs were removed. Thereafter 'Knee' plot was constructed using the cumulative  
491 fraction of reads/UMIs for all barcodes. Barcodes below the cut-off defined by the location of the

492 knee were assigned as true cell barcodes and quantified. Further noise filtration was done by  
493 removing cells having >3% mitochondrial counts and total read counts >24,000. Genes not  
494 expressed in any cell were also removed as an additional clean-up step. Cleaned up reads were  
495 normalized using counts per million (CPM) method followed by log transformation generating  
496 count matrices for each sample. Samples were batch corrected on the basis of expressed genes  
497 and mitochondrial reads percent. Dotplot was generated in R (v4.0.3) using ggplot2 (v3.3.3)  
498 package.

#### 499 500 **ChromHMM analysis**

501 We conducted ChromHMM <sup>74</sup> chromatin state enrichment analysis with chromatin state  
502 annotations from Fetal 17 weeks and Adult chondrocytes tissues using a previously defined 12-  
503 state model <sup>24</sup>. Hypermethylated and hypomethylated age-correlated CpGs were determined by  
504 EWAS as mentioned previously. Using the OverlapEnrichment command of ChromHMM we  
505 computed the enrichment for the coordinates set of hypermethylated and hypomethylated age-  
506 correlated CpGs. We did the same for the coordinates of all CpGs on the array, and then divided  
507 the hypermethylated and hypomethylated age-correlated CpG enrichment values by these  
508 enrichment values to obtain the enrichment relative to the array background.  
509

510

#### 511 **ATAC-sequencing and data analysis**

512 Samples were washed, lysed followed by nuclei tagmentation and adapter ligation by Tn5 using  
513 the Nextera DNA Sample Preparation kit (Illumina). Transposed DNA fragments were amplified  
514 using the NEBNext Q5 HotStart HiFi PCR Master Mix with regular forward and reverse barcoded  
515 primers. The final product was purified with MinElute PCR Purification kit (Qiagen), and quality  
516 checked on 2100 Bioanalyzer (Agilent). Sequencing was performed on Illumina HiSeq 2500 with  
517 single-end 50 base pair reads. The initial quality of the raw fastq files were checked using FastQC  
518 (<https://www.bioinformatics.babraham.ac.uk/projects/fastqc/>). Reads were trimmed using  
519 Cutadapt v2.10 <sup>75</sup> in paired-end mode. Trimmed reads were aligned to human genome build hg19  
520 using bowtie2. PCR duplicates were removed from the aligned reads followed by sorting and  
521 indexing of the bam files by SAMtools v1.11 <sup>76</sup>. Bam coverage maps were generated using  
522 bamCoverage from the deepTools suite v3.5.0 <sup>77</sup>. Significant peaks (p-value<0.05) were called  
523 using MACS2 <sup>78</sup> and annotated using R.  
524

525

#### 526 **Cleavage Under Targets and Release Using Nuclease (CUT&RUN)**

527

528 In situ chromatin profiling using CUT & RUN was performed according to Skene et al <sup>34</sup>. Briefly  
529 samples were FACS sorted using DAPI to select live cells and 10,000 cells were collected in  
530 10%FBS-PBS media. Cell nuclei were immobilized on Concanavalin A beads after washing.  
531 pSTAT3 (Tyr705,D3A7,9145,Cell signaling technology) or normal rabbit IgG antibodies  
532 (3900,Cell signaling technology) were incubated with the nuclei overnight in the presence of  
533 0.02% digitonin at 4°. The next day, 700ng/mL of proteinA-micrococcal nuclease (pA-Mnase  
534 purified in house with vector from Addgene 86973 <sup>79</sup>) were incubated with the nuclei at 4 degrees  
535 for an hour. After washing, the tubes were placed in heat blocks on ice set to 0 degrees, CaCl<sub>2</sub>  
536 (1mM) was added and incubated for 30 min before 2X Stop buffer containing EDTA was added.  
537 DNA was extracted using Qiagen DNA isolation kit according to manufacturer's protocol Purified  
538 DNA was quantified in Qubit and Bioanalyzer (2100) traces using D5000 high sensitivity chip were  
539 run to determine the size of the cleaved products. UMI-coded libraries were generated using Swift  
540 Biosciences-ACCEL-NGS® 2S PLUS DNA LIBRARY KITS according to manufacturer's protocol.  
541 Pair-end (75bp) Illumina sequencing was performed on the UMI-coded and amplified libraries  
542 using NextSeq platform.

543

#### 544 **CUT&RUN data analysis**

545 UMI-tools <sup>80</sup> 'extract' function was used to remove UMIs from each read of the raw fastq files and  
546 append them to the read name. The initial quality of the raw fastq files were checked using FastQC  
547 (<https://www.bioinformatics.babraham.ac.uk/projects/fastqc/>). Reads were trimmed using  
548 Cutadapt v2.10 <sup>75</sup> in paired-end mode. Trimmed reads were aligned to human genome build hg19  
549 using bowtie2. Next, aligned reads were deduplicated and PCR duplicates were removed by UMI-  
550 tools 'dedup' function followed by sorting and indexing of the deduplicated bam files by SAMtools  
551 v1.11 <sup>76</sup>. Bam coverage maps were generated using bamCoverage from the deepTools suite  
552 v3.5.0 <sup>77</sup>. Heatmaps were generated using computeMatrix and plotHeatmap from the deepTools  
553 suite v3.5.0. Significant peaks (p-value<0.05) were called from the deduplicated reads using  
554 MACS2 <sup>78</sup> and annotated using the R package ChIPseeker <sup>81</sup>. Subsequently, peak files were used  
555 to determine enriched motifs using HOMER v4.11.1 <sup>82</sup>. Functional enrichment analysis for the  
556 nearest genes annotated to the peaks was determined by the R package clusterProfiler <sup>83</sup>. Two-  
557 way Venn diagrams were generated using BioVenn <sup>84</sup>, while 4-way Venn diagrams were  
558 constructed using InteractiVenn <sup>85</sup>.

#### 559 **Western blot analysis**

560 Osteoarthritic chondrocytes were lysed in RIPA Lysis and Extraction Buffer (Pierce) containing  
561 protease inhibitors (Pierce) followed by sonication with a 15-second pulse at a power output of 2



562 using the VirSonic 100 (SP Industries Company). Protein concentrations were determined by BCA  
563 protein assay (Pierce) and boiled for 5 minutes with Laemmli Sample Buffer (Bio-Rad, Hercules,  
564 CA). Proteins were separated on acrylamide gels and analyzed by Western blot using primary  
565 antibodies: anti-pSTAT3 (9145) and anti-Histone H3 (9515; all from Cell Signaling). Histone H3  
566 antibody was used as a loading control. Proteins were resolved with SDS-PAGE utilizing 4–15%  
567 Mini-PROTEAN TGX Precast Gels and transferred to Trans-Blot Turbo Transfer Packs with a 0.2-  
568  $\mu\text{m}$  pore-size nitrocellulose membrane. The SDS-PAGE running buffer, 4–15% Mini-PROTEAN  
569 TGX Precast Gels, Trans-Blot Turbo Transfer Packs with a 0.2- $\mu\text{m}$  pore-size nitrocellulose  
570 membrane were purchased from Bio-Rad. Nitrocellulose membranes were blocked in 5% nonfat  
571 milk in 0.05% (v/v) Tween 20 (Corning). Membranes were then incubated with primary antibodies  
572 overnight. After washing in PBS containing 0.05% (v/v) Tween 20 (PBST), membranes were  
573 incubated with secondary antibodies (31460 and 31430, Thermo Scientific). After washing,  
574 development was performed with the Clarity Western ECL Blotting Substrate (Bio-Rad).

575

## 576 **Data Availability**

577 All data is deposited in GEO and is available under the accession number GSEXXXX.

## 578 **Funding**

579 This work was supported by National Institutes of Health grant R01AR071734 (DE) and the  
580 National Institutes of Health grant R01AG058624 (DE), Department of Defense grant W81XWH-  
581 13-1-0465 (DE), California Institute of Regenerative Medicine grant TRAN1-09288 (DE).

582

## 583 **References**

584

- 585 1 Arenas Gomez, C. M., Sabin, K. Z. & Echeverri, K. Wound healing across the animal  
586 kingdom: Crosstalk between the immune system and the extracellular matrix. *Dev Dyn*  
587 **249**, 834-846, doi:10.1002/dvdy.178 (2020).
- 588 2 Liu, Y., Lou, W. P. & Fei, J. F. The engine initiating tissue regeneration: does a common  
589 mechanism exist during evolution? *Cell Regen* **10**, 12, doi:10.1186/s13619-020-00073-1  
590 (2021).
- 591 3 Sophia Fox, A. J., Bedi, A. & Rodeo, S. A. The basic science of articular cartilage:  
592 structure, composition, and function. *Sports Health* **1**, 461-468,  
593 doi:10.1177/1941738109350438 (2009).
- 594 4 Martin, J. A. & Buckwalter, J. A. Aging, articular cartilage chondrocyte senescence and  
595 osteoarthritis. *Biogerontology* **3**, 257-264, doi:10.1023/a:1020185404126 (2002).

- 596 5 Brunet, A. & Berger, S. L. Epigenetics of aging and aging-related disease. *J Gerontol A*  
597 *Biol Sci Med Sci* **69 Suppl 1**, S17-20, doi:10.1093/gerona/glu042 (2014).
- 598 6 Unnikrishnan, A. *et al.* The role of DNA methylation in epigenetics of aging. *Pharmacol*  
599 *Ther* **195**, 172-185, doi:10.1016/j.pharmthera.2018.11.001 (2019).
- 600 7 Gentilini, D. *et al.* Role of epigenetics in human aging and longevity: genome-wide DNA  
601 methylation profile in centenarians and centenarians' offspring. *Age (Dordr)* **35**, 1961-  
602 1973, doi:10.1007/s11357-012-9463-1 (2013).
- 603 8 Paulsen, M. & Ferguson-Smith, A. C. DNA methylation in genomic imprinting,  
604 development, and disease. *J Pathol* **195**, 97-110, doi:10.1002/path.890 (2001).
- 605 9 Greenberg, M. V. C. & Bourc'his, D. The diverse roles of DNA methylation in mammalian  
606 development and disease. *Nat Rev Mol Cell Biol* **20**, 590-607, doi:10.1038/s41580-019-  
607 0159-6 (2019).
- 608 10 Vijg, J. & Campisi, J. Puzzles, promises and a cure for ageing. *Nature* **454**, 1065-1071,  
609 doi:10.1038/nature07216 (2008).
- 610 11 Harley, C. B., Futcher, A. B. & Greider, C. W. Telomeres shorten during ageing of human  
611 fibroblasts. *Nature* **345**, 458-460, doi:10.1038/345458a0 (1990).
- 612 12 de Magalhaes, J. P., Curado, J. & Church, G. M. Meta-analysis of age-related gene  
613 expression profiles identifies common signatures of aging. *Bioinformatics* **25**, 875-881,  
614 doi:10.1093/bioinformatics/btp073 (2009).
- 615 13 Horvath, S. & Raj, K. DNA methylation-based biomarkers and the epigenetic clock theory  
616 of ageing. *Nat Rev Genet* **19**, 371-384, doi:10.1038/s41576-018-0004-3 (2018).
- 617 14 Hannum, G. *et al.* Genome-wide methylation profiles reveal quantitative views of human  
618 aging rates. *Mol Cell* **49**, 359-367, doi:10.1016/j.molcel.2012.10.016 (2013).
- 619 15 Horvath, S. DNA methylation age of human tissues and cell types. *Genome Biol* **14**, R115,  
620 doi:10.1186/gb-2013-14-10-r115 (2013).
- 621 16 Nakao, S., Tsukamoto, T., Ueyama, T. & Kawamura, T. STAT3 for Cardiac Regenerative  
622 Medicine: Involvement in Stem Cell Biology, Pathophysiology, and Bioengineering. *Int J*  
623 *Mol Sci* **21**, doi:10.3390/ijms21061937 (2020).
- 624 17 Zhang, Y. *et al.* Stat3 activation is critical for pluripotency maintenance. *J Cell Physiol* **234**,  
625 1044-1051, doi:10.1002/jcp.27241 (2019).
- 626 18 Tang, Y. *et al.* Jak/Stat3 signaling promotes somatic cell reprogramming by epigenetic  
627 regulation. *Stem Cells* **30**, 2645-2656, doi:10.1002/stem.1225 (2012).
- 628 19 Hanna, J. H. The STATs on naive iPSC reprogramming. *Cell Stem Cell* **7**, 274-276,  
629 doi:10.1016/j.stem.2010.08.005 (2010).

- 630 20 Zhang, Q. *et al.* STAT3- and DNA methyltransferase 1-mediated epigenetic silencing of  
631 SHP-1 tyrosine phosphatase tumor suppressor gene in malignant T lymphocytes. *Proc*  
632 *Natl Acad Sci U S A* **102**, 6948-6953, doi:10.1073/pnas.0501959102 (2005).
- 633 21 Wingelhofer, B. *et al.* Implications of STAT3 and STAT5 signaling on gene regulation and  
634 chromatin remodeling in hematopoietic cancer. *Leukemia* **32**, 1713-1726,  
635 doi:10.1038/s41375-018-0117-x (2018).
- 636 22 Yang, J. *et al.* Reversible methylation of promoter-bound STAT3 by histone-modifying  
637 enzymes. *Proc Natl Acad Sci U S A* **107**, 21499-21504, doi:10.1073/pnas.1016147107  
638 (2010).
- 639 23 Shkhyan, R. *et al.* Drug-induced modulation of gp130 signalling prevents articular cartilage  
640 degeneration and promotes repair. *Ann Rheum Dis* **77**, 760-769,  
641 doi:10.1136/annrheumdis-2017-212037 (2018).
- 642 24 Ferguson, G. B. *et al.* Mapping molecular landmarks of human skeletal ontogeny and  
643 pluripotent stem cell-derived articular chondrocytes. *Nat Commun* **9**, 3634,  
644 doi:10.1038/s41467-018-05573-y (2018).
- 645 25 Petrigliano, F. A. *et al.* Long-term repair of porcine articular cartilage using  
646 cryopreservable, clinically compatible human embryonic stem cell-derived chondrocytes.  
647 *bioRxiv*, 2021.2005.2027.446024, doi:10.1101/2021.05.27.446024 (2021).
- 648 26 Park, S. J., Cheon, E. J., Lee, M. H. & Kim, H. A. MicroRNA-127-5p regulates matrix  
649 metalloproteinase 13 expression and interleukin-1beta-induced catabolic effects in human  
650 chondrocytes. *Arthritis Rheum* **65**, 3141-3152, doi:10.1002/art.38188 (2013).
- 651 27 Xu, S. & Wu, X. miR-134 inhibits chondrogenic differentiation of bone marrow  
652 mesenchymal stem cells by targetting SMAD6. *Biosci Rep* **39**, doi:10.1042/BSR20180921  
653 (2019).
- 654 28 Chen, X. *et al.* Mesenchymal stem cell-derived exosomal microRNA-136-5p inhibits  
655 chondrocyte degeneration in traumatic osteoarthritis by targeting ELF3. *Arthritis Res Ther*  
656 **22**, 256, doi:10.1186/s13075-020-02325-6 (2020).
- 657 29 Zhang, F. Y. *et al.* miR-143 is implicated in growth plate injury by targeting IHH in  
658 precartilaginous stem cells. *Int J Med Sci* **18**, 1999-2007, doi:10.7150/ijms.46474 (2021).
- 659 30 Robertson, K. D. DNA methylation and chromatin - unraveling the tangled web. *Oncogene*  
660 **21**, 5361-5379, doi:10.1038/sj.onc.1205609 (2002).
- 661 31 Bernstein, B. E. *et al.* A bivalent chromatin structure marks key developmental genes in  
662 embryonic stem cells. *Cell* **125**, 315-326, doi:10.1016/j.cell.2006.02.041 (2006).

- 663 32 Cheung, K. *et al.* Histone ChIP-Seq identifies differential enhancer usage during  
664 chondrogenesis as critical for defining cell-type specificity. *FASEB J* **34**, 5317-5331,  
665 doi:10.1096/fj.201902061RR (2020).
- 666 33 Sims, N. A. The JAK1/STAT3/SOCS3 axis in bone development, physiology, and  
667 pathology. *Exp Mol Med* **52**, 1185-1197, doi:10.1038/s12276-020-0445-6 (2020).
- 668 34 Skene, P. J., Henikoff, J. G. & Henikoff, S. Targeted in situ genome-wide profiling with  
669 high efficiency for low cell numbers. *Nat Protoc* **13**, 1006-1019,  
670 doi:10.1038/nprot.2018.015 (2018).
- 671 35 Tripathi, S. K. *et al.* Genome-wide Analysis of STAT3-Mediated Transcription during Early  
672 Human Th17 Cell Differentiation. *Cell Rep* **19**, 1888-1901,  
673 doi:10.1016/j.celrep.2017.05.013 (2017).
- 674 36 Hirahara, K. *et al.* Signal transduction pathways and transcriptional regulation in Th17 cell  
675 differentiation. *Cytokine Growth Factor Rev* **21**, 425-434,  
676 doi:10.1016/j.cytogfr.2010.10.006 (2010).
- 677 37 Qiu, D. *et al.* Klf2 and Tfcp2l1, Two Wnt/beta-Catenin Targets, Act Synergistically to  
678 Induce and Maintain Naive Pluripotency. *Stem Cell Reports* **5**, 314-322,  
679 doi:10.1016/j.stemcr.2015.07.014 (2015).
- 680 38 Gao, Y. *et al.* The ECM-cell interaction of cartilage extracellular matrix on chondrocytes.  
681 *Biomed Res Int* **2014**, 648459, doi:10.1155/2014/648459 (2014).
- 682 39 Lefebvre, V. Roles and regulation of SOX transcription factors in skeletogenesis. *Curr Top*  
683 *Dev Biol* **133**, 171-193, doi:10.1016/bs.ctdb.2019.01.007 (2019).
- 684 40 Petersson, M. *et al.* TCF/Lef1 activity controls establishment of diverse stem and  
685 progenitor cell compartments in mouse epidermis. *EMBO J* **30**, 3004-3018,  
686 doi:10.1038/emboj.2011.199 (2011).
- 687 41 Kitajima, K. *et al.* Redirecting differentiation of hematopoietic progenitors by a transcription  
688 factor, GATA-2. *Blood* **107**, 1857-1863, doi:10.1182/blood-2005-06-2527 (2006).
- 689 42 Alvisi, G. *et al.* IRF4 instructs effector Treg differentiation and immune suppression in  
690 human cancer. *J Clin Invest* **130**, 3137-3150, doi:10.1172/JCI130426 (2020).
- 691 43 Natsumeda, M. *et al.* GLI3 Is Associated With Neuronal Differentiation in SHH-Activated  
692 and WNT-Activated Medulloblastoma. *J Neuropathol Exp Neurol* **80**, 129-136,  
693 doi:10.1093/jnen/nlaa141 (2021).
- 694 44 Arzate-Mejia, R. G., Recillas-Targa, F. & Corces, V. G. Developing in 3D: the role of CTCF  
695 in cell differentiation. *Development* **145**, doi:10.1242/dev.137729 (2018).

- 696 45 Iwasaki, H. *et al.* GATA-1 converts lymphoid and myelomonocytic progenitors into the  
697 megakaryocyte/erythrocyte lineages. *Immunity* **19**, 451-462, doi:10.1016/s1074-  
698 7613(03)00242-5 (2003).
- 699 46 Oki, S. *et al.* ChIP-Atlas: a data-mining suite powered by full integration of public ChIP-  
700 seq data. *EMBO Rep* **19**, doi:10.15252/embr.201846255 (2018).
- 701 47 Mei, S. *et al.* Cistrome Data Browser: a data portal for ChIP-Seq and chromatin  
702 accessibility data in human and mouse. *Nucleic Acids Res* **45**, D658-D662,  
703 doi:10.1093/nar/gkw983 (2017).
- 704 48 Zheng, R. *et al.* Cistrome Data Browser: expanded datasets and new tools for gene  
705 regulatory analysis. *Nucleic Acids Res* **47**, D729-D735, doi:10.1093/nar/gky1094 (2019).
- 706 49 Liu Q. Nancy, L. Y., Li Liangliang, Lu Jinxiu, Geng Dawei, Zhang Jiankang, Jashashvili  
707 Tea, Buser Zorica, Magallanes Jenny, Tassy Jade, Shkhyan Ruzanna, Sarkar Arijita, Lopez  
708 Noah, Wang Liming, Petrigliano A. Frank, Van Handel Ben, Lyons Karen and Evseenko  
709 Denis. gp130/STAT3 signaling is required for homeostatic proliferation and anabolism in  
710 postnatal growth plate and articular chondrocytes. *Manuscript under revision* (2021).
- 711 50 Wang, F., Guo, Z. & Yuan, Y. STAT3 speeds up progression of osteoarthritis through NF-  
712 kappaB signaling pathway. *Exp Ther Med* **19**, 722-728, doi:10.3892/etm.2019.8268  
713 (2020).
- 714 51 Hneino, M. *et al.* The TG-interacting factor TGIF1 regulates stress-induced  
715 proinflammatory phenotype of endothelial cells. *J Biol Chem* **287**, 38913-38921,  
716 doi:10.1074/jbc.M112.388389 (2012).
- 717 52 Thomsen, M. K. *et al.* JUNB/AP-1 controls IFN-gamma during inflammatory liver disease.  
718 *J Clin Invest* **123**, 5258-5268, doi:10.1172/JCI70405 (2013).
- 719 53 Renoux, F. *et al.* The AP1 Transcription Factor FosI2 Promotes Systemic Autoimmunity  
720 and Inflammation by Repressing Treg Development. *Cell Rep* **31**, 107826,  
721 doi:10.1016/j.celrep.2020.107826 (2020).
- 722 54 Fan, W. *et al.* FoxO1 regulates Tlr4 inflammatory pathway signalling in macrophages.  
723 *EMBO J* **29**, 4223-4236, doi:10.1038/emboj.2010.268 (2010).
- 724 55 Teschendorff, A. E. *et al.* Age-dependent DNA methylation of genes that are suppressed  
725 in stem cells is a hallmark of cancer. *Genome Res* **20**, 440-446,  
726 doi:10.1101/gr.103606.109 (2010).
- 727 56 Horvath, S. *et al.* Aging effects on DNA methylation modules in human brain and blood  
728 tissue. *Genome Biol* **13**, R97, doi:10.1186/gb-2012-13-10-r97 (2012).

- 729 57 Jylhava, J., Pedersen, N. L. & Hagg, S. Biological Age Predictors. *EBioMedicine* **21**, 29-  
730 36, doi:10.1016/j.ebiom.2017.03.046 (2017).
- 731 58 Flores, A. *et al.* Lactate dehydrogenase activity drives hair follicle stem cell activation. *Nat*  
732 *Cell Biol* **19**, 1017-1026, doi:10.1038/ncb3575 (2017).
- 733 59 Singh, P., Lessard, S. G., Mukherjee, P., Rourke, B. & Otero, M. Changes in DNA  
734 methylation accompany changes in gene expression during chondrocyte hypertrophic  
735 differentiation in vitro. *Ann N Y Acad Sci* **1490**, 42-56, doi:10.1111/nyas.14494 (2021).
- 736 60 Swingler, T. E. *et al.* The function of microRNAs in cartilage and osteoarthritis. *Clin Exp*  
737 *Rheumatol* **37 Suppl 120**, 40-47 (2019).
- 738 61 Glaich, O. *et al.* DNA methylation directs microRNA biogenesis in mammalian cells. *Nat*  
739 *Commun* **10**, 5657, doi:10.1038/s41467-019-13527-1 (2019).
- 740 62 Baker, G. T., 3rd & Sprott, R. L. Biomarkers of aging. *Exp Gerontol* **23**, 223-239,  
741 doi:10.1016/0531-5565(88)90025-3 (1988).
- 742 63 Wu, L. *et al.* Extracellular matrix domain formation as an indicator of chondrocyte  
743 dedifferentiation and hypertrophy. *Tissue Eng Part C Methods* **20**, 160-168,  
744 doi:10.1089/ten.TEC.2013.0056 (2014).
- 745 64 Dunning, M. J., Barbosa-Morais, N. L., Lynch, A. G., Tavaré, S. & Ritchie, M. E. Statistical  
746 issues in the analysis of Illumina data. *BMC Bioinformatics* **9**, 85, doi:10.1186/1471-2105-  
747 9-85 (2008).
- 748 65 Aryee, M. J. *et al.* Minfi: a flexible and comprehensive Bioconductor package for the  
749 analysis of Infinium DNA methylation microarrays. *Bioinformatics* **30**, 1363-1369,  
750 doi:10.1093/bioinformatics/btu049 (2014).
- 751 66 Fortin, J. P., Triche, T. J., Jr. & Hansen, K. D. Preprocessing, normalization and integration  
752 of the Illumina HumanMethylationEPIC array with minfi. *Bioinformatics* **33**, 558-560,  
753 doi:10.1093/bioinformatics/btw691 (2017).
- 754 67 Rakyan, V. K. *et al.* Human aging-associated DNA hypermethylation occurs preferentially  
755 at bivalent chromatin domains. *Genome Res* **20**, 434-439, doi:10.1101/gr.103101.109  
756 (2010).
- 757 68 Langfelder, P. & Horvath, S. WGCNA: an R package for weighted correlation network  
758 analysis. *BMC Bioinformatics* **9**, 559, doi:10.1186/1471-2105-9-559 (2008).
- 759 69 Dobin, A. *et al.* STAR: ultrafast universal RNA-seq aligner. *Bioinformatics* **29**, 15-21,  
760 doi:10.1093/bioinformatics/bts635 (2013).
- 761 70 Xie, Z. *et al.* Gene Set Knowledge Discovery with Enrichr. *Curr Protoc* **1**, e90,  
762 doi:10.1002/cpz1.90 (2021).

- 763 71 Kuleshov, M. V. *et al.* Enrichr: a comprehensive gene set enrichment analysis web server  
764 2016 update. *Nucleic Acids Res* **44**, W90-97, doi:10.1093/nar/gkw377 (2016).
- 765 72 Chen, E. Y. *et al.* Enrichr: interactive and collaborative HTML5 gene list enrichment  
766 analysis tool. *BMC Bioinformatics* **14**, 128, doi:10.1186/1471-2105-14-128 (2013).
- 767 73 Langmead, B., Trapnell, C., Pop, M. & Salzberg, S. L. Ultrafast and memory-efficient  
768 alignment of short DNA sequences to the human genome. *Genome Biol* **10**, R25,  
769 doi:10.1186/gb-2009-10-3-r25 (2009).
- 770 74 Ernst, J. & Kellis, M. ChromHMM: automating chromatin-state discovery and  
771 characterization. *Nat Methods* **9**, 215-216, doi:10.1038/nmeth.1906 (2012).
- 772 75 Martin, M. Cutadapt removes adapter sequences from high-throughput sequencing reads.  
773 *2011* **17**, 3, doi:10.14806/ej.17.1.200 (2011).
- 774 76 Li, H. *et al.* The Sequence Alignment/Map format and SAMtools. *Bioinformatics* **25**, 2078-  
775 2079, doi:10.1093/bioinformatics/btp352 (2009).
- 776 77 Ramirez, F. *et al.* deepTools2: a next generation web server for deep-sequencing data  
777 analysis. *Nucleic Acids Res* **44**, W160-165, doi:10.1093/nar/gkw257 (2016).
- 778 78 Zhang, Y. *et al.* Model-based analysis of ChIP-Seq (MACS). *Genome Biol* **9**, R137,  
779 doi:10.1186/gb-2008-9-9-r137 (2008).
- 780 79 Schmid, M., Durussel, T. & Laemmli, U. K. ChIC and ChEC; genomic mapping of  
781 chromatin proteins. *Mol Cell* **16**, 147-157, doi:10.1016/j.molcel.2004.09.007 (2004).
- 782 80 Smith, T., Heger, A. & Sudbery, I. UMI-tools: modeling sequencing errors in Unique  
783 Molecular Identifiers to improve quantification accuracy. *Genome Res* **27**, 491-499,  
784 doi:10.1101/gr.209601.116 (2017).
- 785 81 Yu, G., Wang, L. G. & He, Q. Y. ChIPseeker: an R/Bioconductor package for ChIP peak  
786 annotation, comparison and visualization. *Bioinformatics* **31**, 2382-2383,  
787 doi:10.1093/bioinformatics/btv145 (2015).
- 788 82 Heinz, S. *et al.* Simple combinations of lineage-determining transcription factors prime cis-  
789 regulatory elements required for macrophage and B cell identities. *Mol Cell* **38**, 576-589,  
790 doi:10.1016/j.molcel.2010.05.004 (2010).
- 791 83 Yu, G., Wang, L. G., Han, Y. & He, Q. Y. clusterProfiler: an R package for comparing  
792 biological themes among gene clusters. *OMICS* **16**, 284-287, doi:10.1089/omi.2011.0118  
793 (2012).
- 794 84 Hulsen, T., de Vlieg, J. & Alkema, W. BioVenn - a web application for the comparison and  
795 visualization of biological lists using area-proportional Venn diagrams. *BMC Genomics* **9**,  
796 488, doi:10.1186/1471-2164-9-488 (2008).

797 85 Heberle, H., Meirelles, G. V., da Silva, F. R., Telles, G. P. & Minghim, R. InteractiVenn: a  
798 web-based tool for the analysis of sets through Venn diagrams. *BMC Bioinformatics* **16**,  
799 169, doi:10.1186/s12859-015-0611-3 (2015).

800

801

802

803

804

805

806

807

808

809

810

811

812

813

814

815

816

817

818

819

820

821

822

823

824

825

826

827 **Figures**



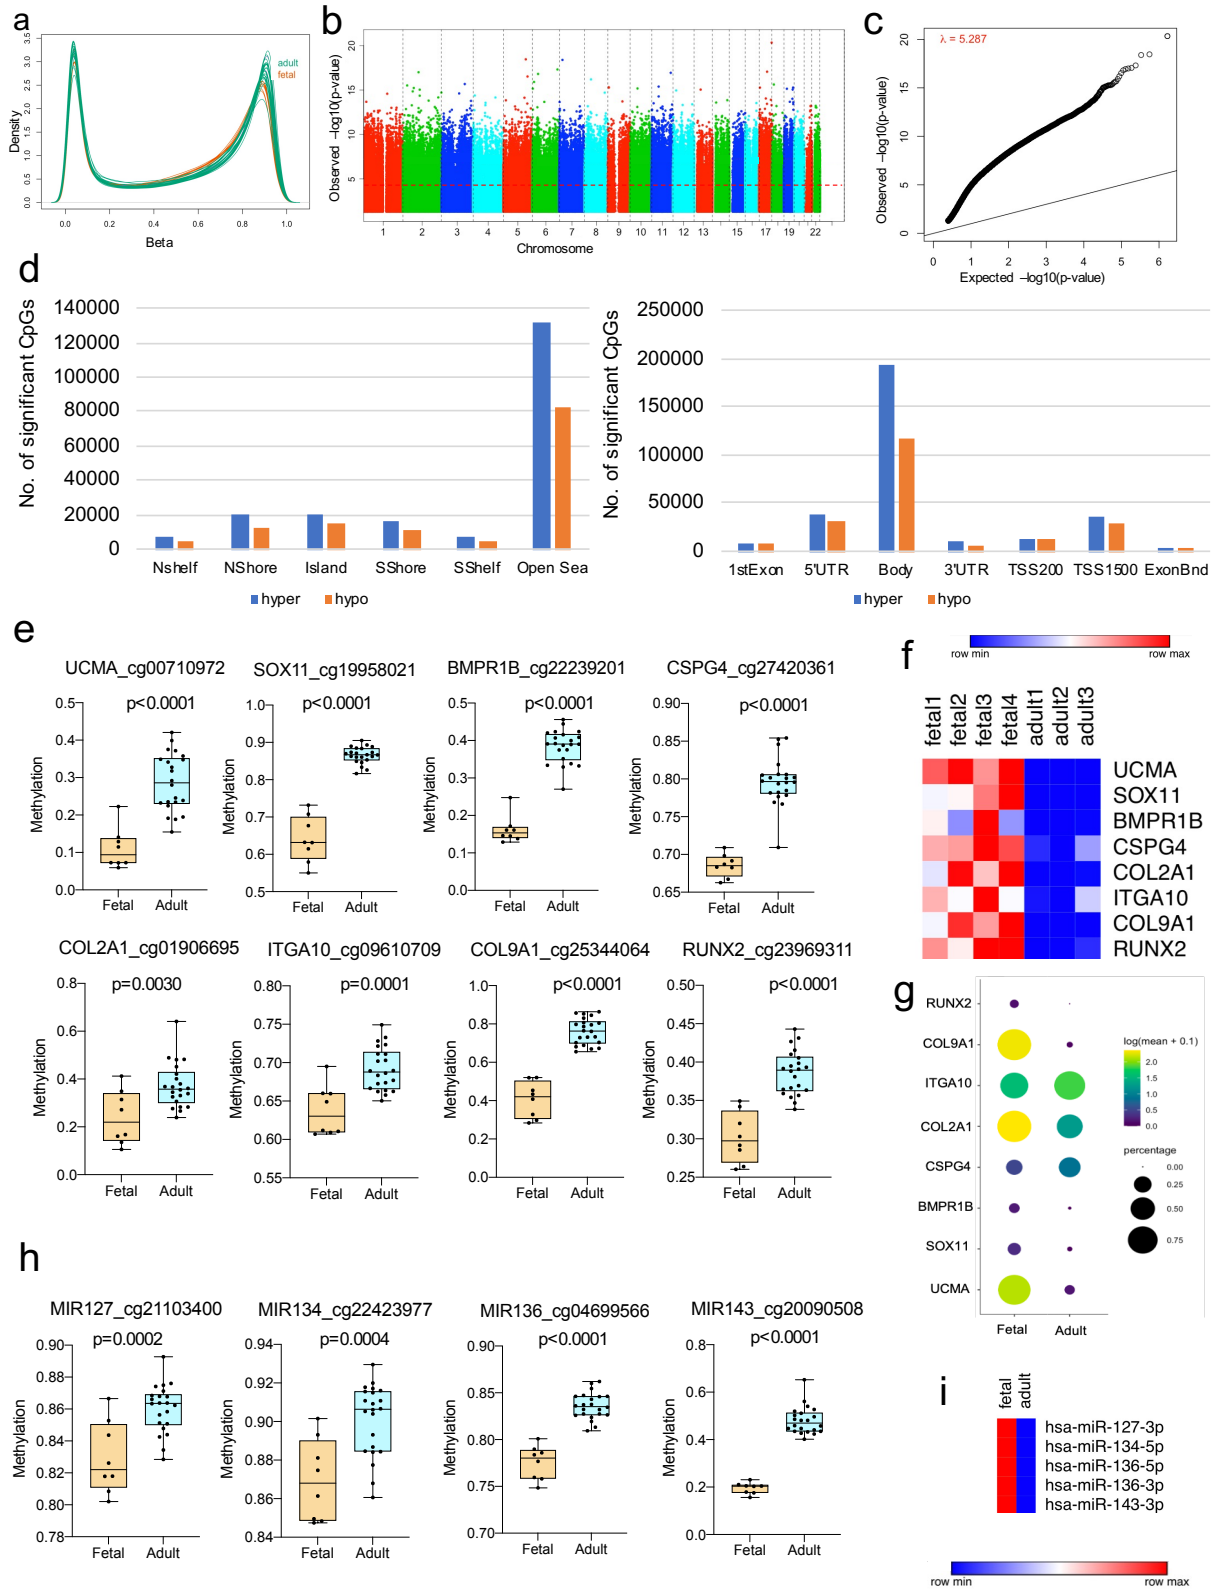

828

829

830 **Figure 1.** Epigenome-wide association study for non-cultured fetal and adult chondrocytes. **a.**  
831 Density plot for all samples. CpGs are shown for 865,859 loci. **b.** Manhattan plot showing  
832 chromosomal locations of age-correlated CpGs along with  $-\log_{10}(P$  values) for association at  
833 each locus. The red dotted line indicates the p-value threshold of 0.05. **c.** QQ plot showing  
834 observed versus expected  $-\log_{10}(P$  values) for age-correlated CpGs **d.** Distribution of CpG  
835 features among age-correlated CpGs. hyper= CpGs gaining methylation with age, hypo= CpGs  
836 losing methylation with age **e.** Boxplot showing methylation level of representative age-correlated  
837 CpGs (i.e., CpGs with highest hypermethylation change across age) corresponding to  
838 chondrogenic genes. **f.** Transcriptomic profile for the chondrogenic genes (shown in e) in fetal  
839 and adult chondrocytes. **g.** Dot plot showing expression for the chondrogenic genes (shown in e)  
840 from single cell sequencing in fetal and adult chondrocytes **h.** Boxplot showing methylation level  
841 of representative age-correlated CpGs (i.e., CpGs with highest hypermethylation change across  
842 age) corresponding to miRNAs expressed in fetal and adult chondrocytes. **i.** miRNA expression  
843 profile for the miRNAs shown in h. Hinges of all boxplots extend from the 25th to 75th percentiles.  
844 The line in the middle of the box is plotted at the median. P-values are calculated using 2-tailed  
845 Student's t test.

846  
847  
848  
849  
850  
851  
852  
853  
854  
855  
856  
857  
858  
859  
860  
861  
862  
863  
864  
865  
866  
867  
868  
869

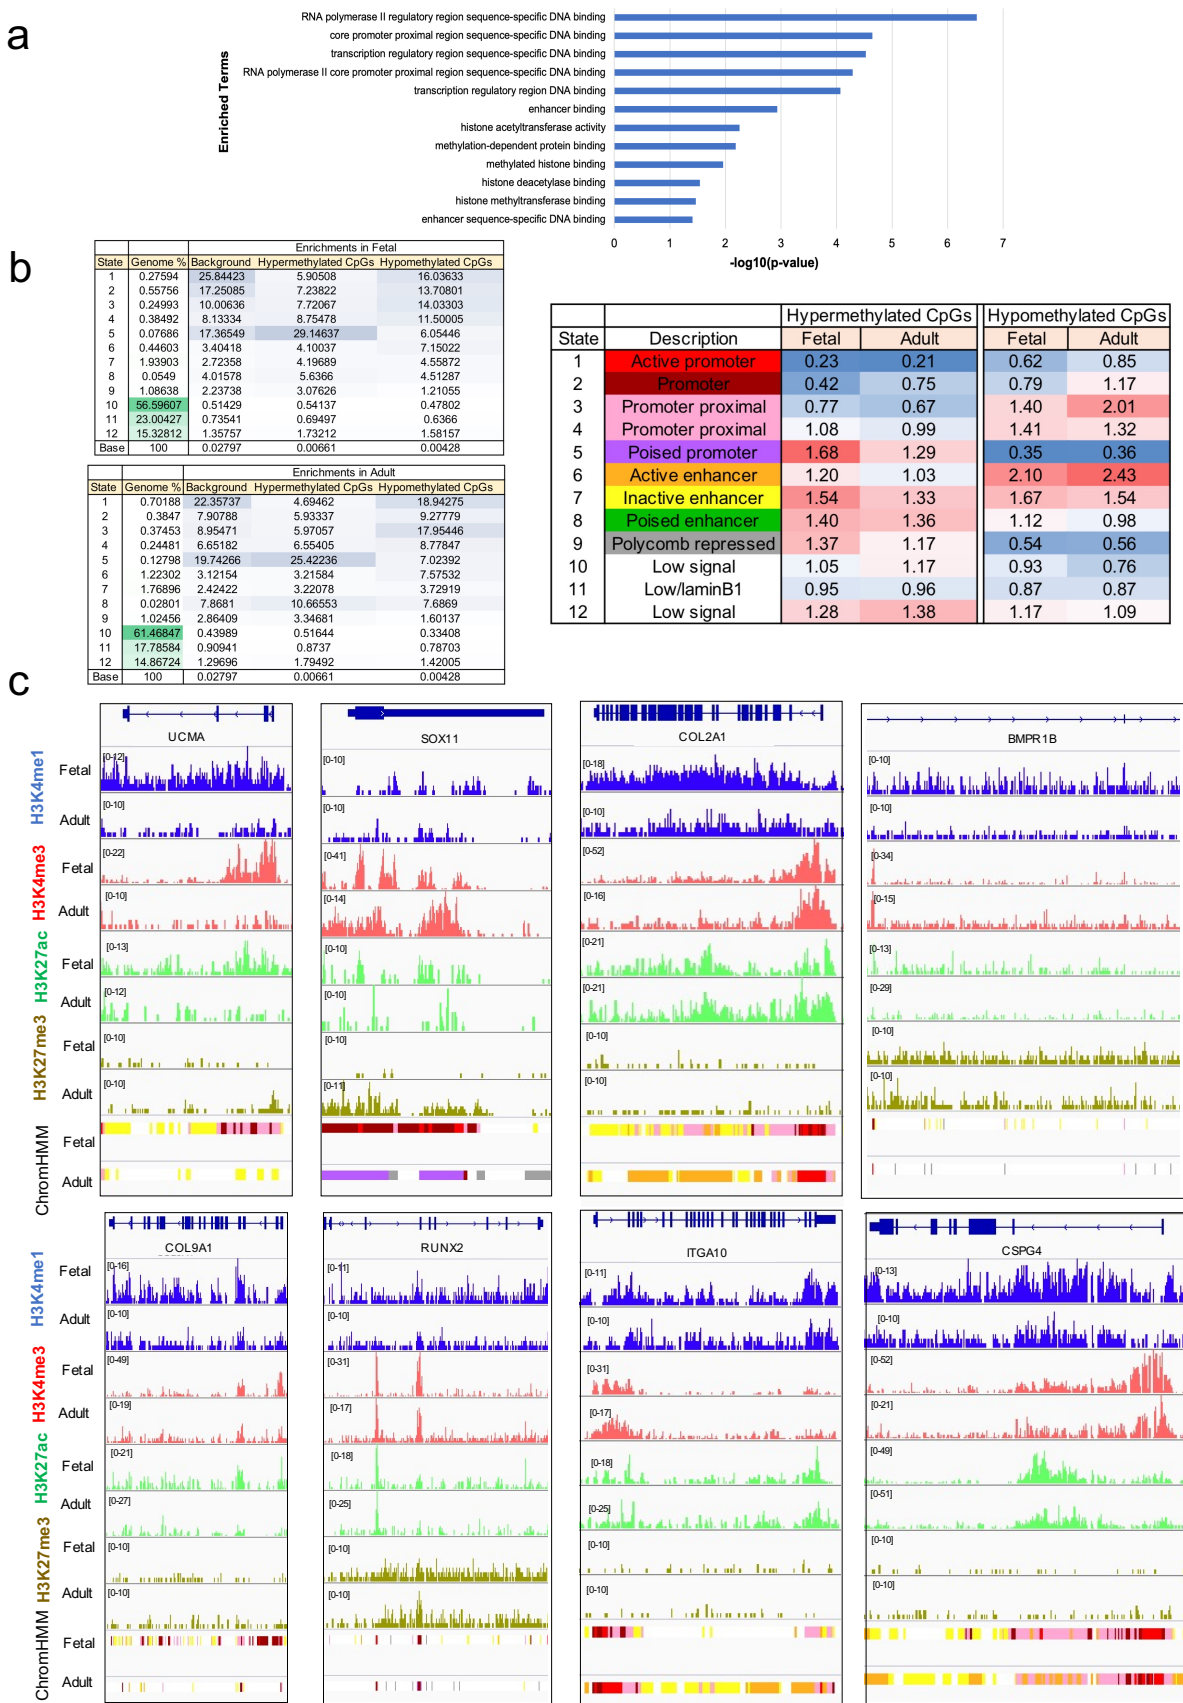

871 **Figure 2.** Age-correlated CpGs are associated with distinct chromatin states. **a.** Gene ontology  
872 analysis for genes associated with the age-correlated CpGs show enrichment for terms  
873 associated with chromatin states and histone modifications using Fisher's exact test ( $p$ -  
874 value $<0.05$ ) **b.** ChromHMM model shows enrichment of the 12 chromatin states for age-  
875 correlated CpGs in fetal and adult chondrocytes. Hypomethylated CpGs refer to CpG sites which  
876 are losing methylation with chondrocyte age. Hypermethylated CpGs refer to CpG sites which are  
877 gaining methylation with chondrocyte age. Emission probabilities (left panel) shows the  
878 occurrence of CpGs in each chromatin state. Rows correspond to chromatin states. The  
879 occurrence of CpGs in each chromatin state is represented by color code: 0(white) to 100(blue).  
880 Chromatin state enrichments (right panel) shows the enrichment score for CpGs in each  
881 chromatin state. A 3-color code was used to represent the range of enrichment score: Lowest  
882 value(blue), 50percentile(white) and Highest value(red). **c.** Chromatin data for chondrogenic  
883 genes shown in fetal and adult chondrocytes. ChromHMM tracks are colored according to the  
884 chromatin state color code in b (right panel).

885  
886  
887  
888  
889  
890  
891  
892  
893  
894  
895  
896  
897  
898  
899  
900  
901  
902  
903  
904  
905  
906  
907  
908  
909  
910  
911

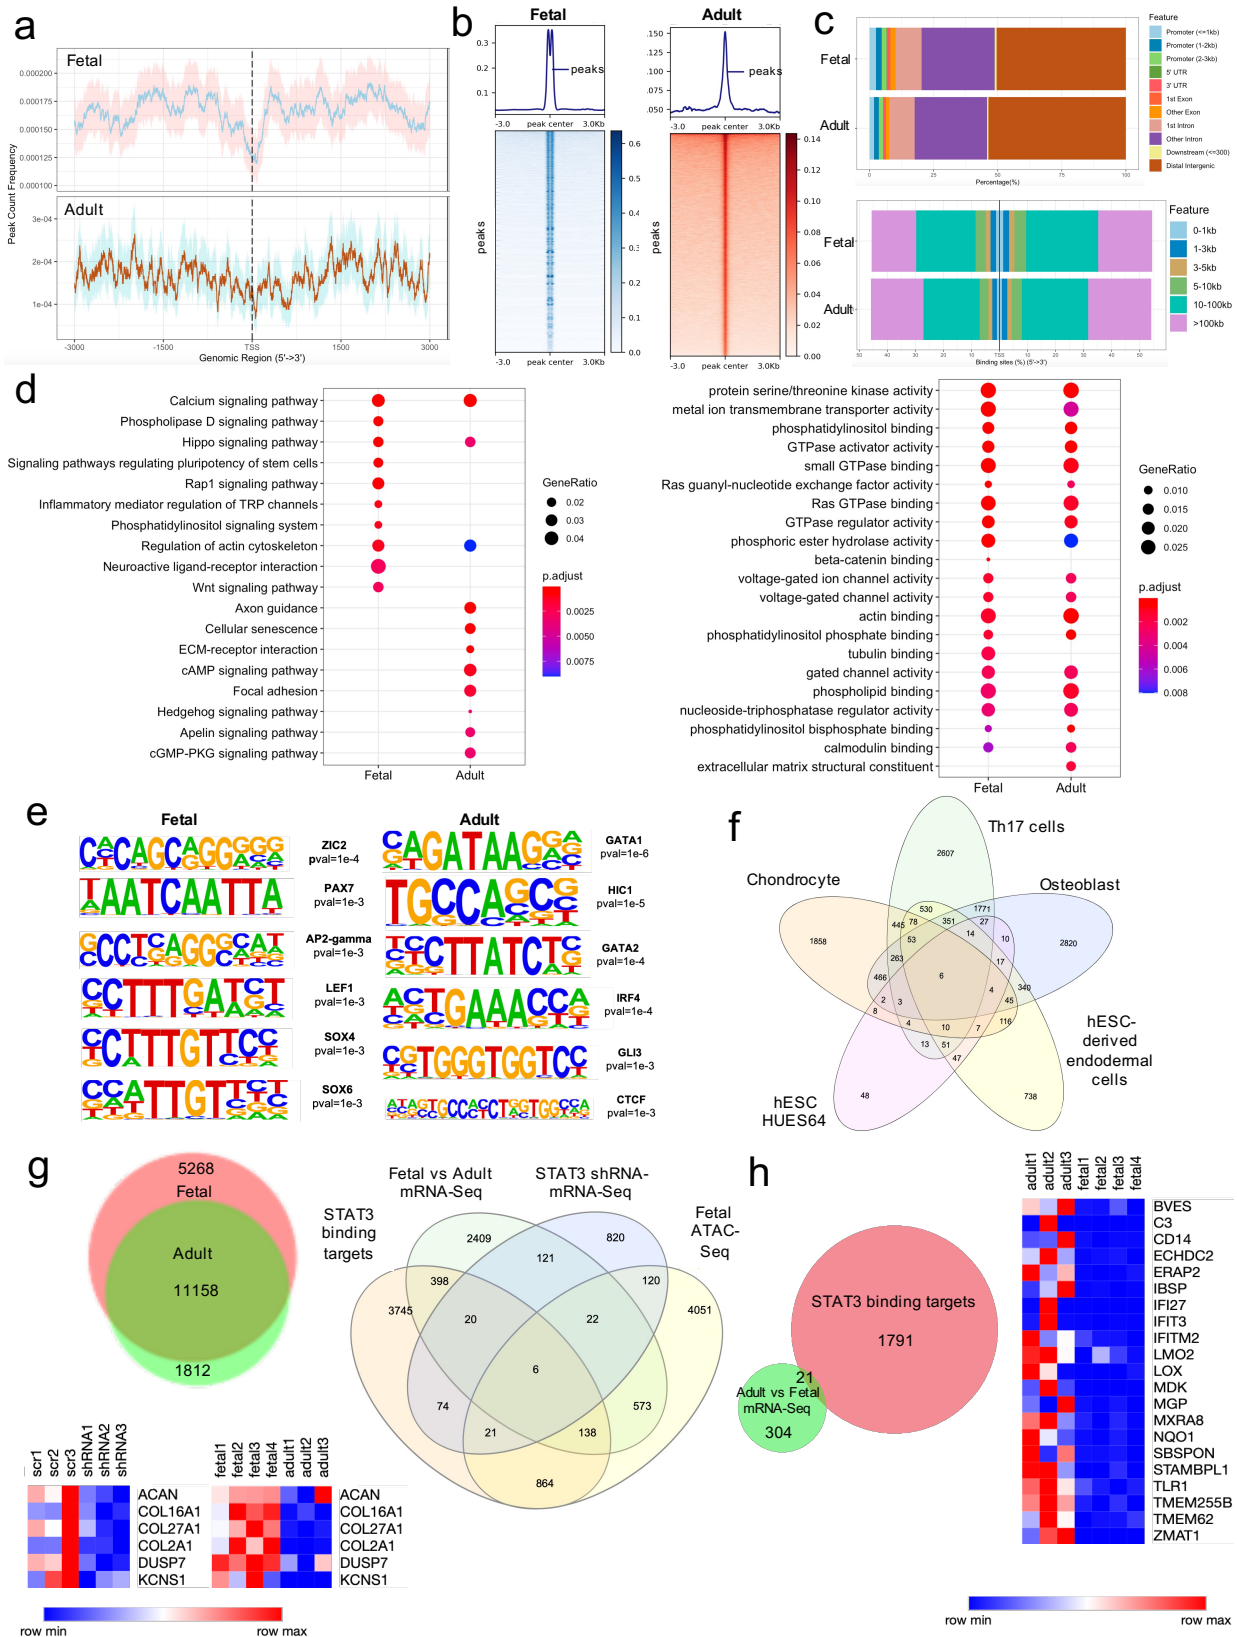

914  
915 **Figure 3.** STAT3 binding targets during chondrocyte development. **a.** Distribution of peak  
916 count frequency across  $\pm 3\text{kb}$  of TSS. Confidence intervals shown by the shadows  
917 following each curve were estimated by bootstrap method using 500 iterations **b.**  
918 Heatmap showing enrichment of reads in peak summits. **c.** Bar plot showing the  
919 distribution of genomic features for peaks in fetal and adult chondrocytes. **d.** Gene  
920 enrichment analysis of putative STAT3 target genes. P-values were adjusted using  
921 Benjamini-Hochberg correction method **e.** DNA motif enrichment analysis for putative  
922 STAT3 binding targets. Binomial distribution was used to score motifs. **f.** Chondrocyte  
923 specific putative STAT3 binding targets compared to other tissue types. **g.** Venn diagram  
924 showing the overlap between putative STAT3 targets in fetal and adult chondrocytes.  
925 5268 exclusive fetal chondrocyte targets were overlapped with Fetal vs adult mRNA-seq,  
926 STAT3 shRNA mRNA-seq and Fetal ATAC-seq data. Heatmaps show the expression  
927 profile (STAT3 knocked-down fetal chondrocytes and fetal vs adult chondrocytes) of the  
928 6 final targets obtained for fetal chondrocytes **h.** 1812 exclusive adult chondrocyte targets  
929 were overlapped with Fetal vs adult mRNA-seq. Heatmaps show the expression profile  
930 (fetal vs adult chondrocytes) of the 21 final targets obtained for adult chondrocytes.

931  
932  
933  
934  
935  
936  
937  
938  
939  
940  
941  
942  
943  
944  
945  
946  
947  
948  
949  
950  
951

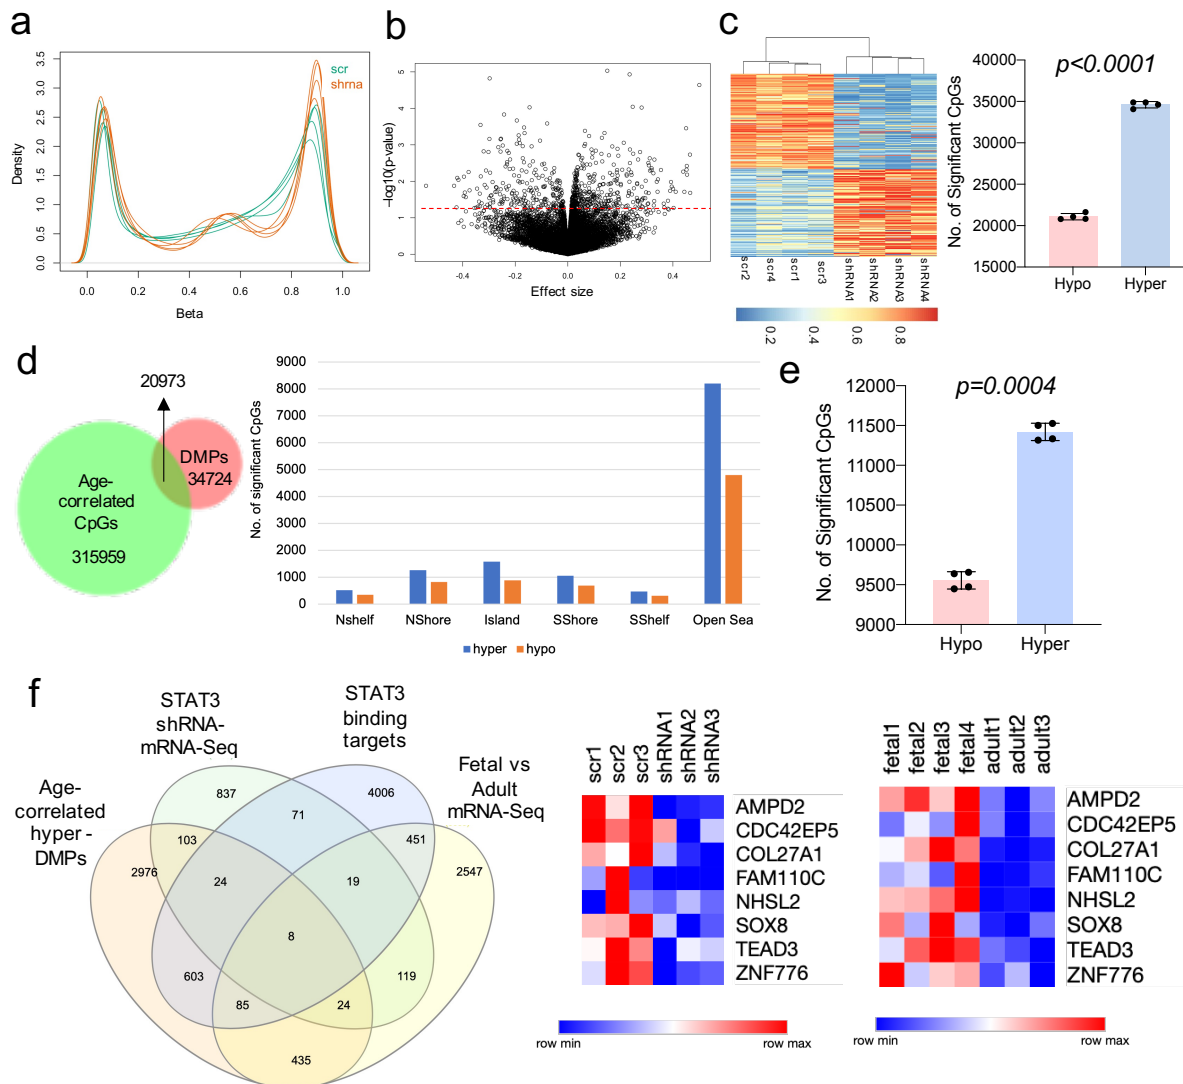

952  
953

954 **Figure 4.** STAT3 knockdown induces genomic hypermethylation in fetal chondrocytes.  
 955 DMPs= differentially methylated CpG probes. **a.** Density plot for all samples **b.** Volcano  
 956 plot for all DMPs. Dotted red line indicates p-value threshold of 0.05. **c.** Heatmap showing  
 957 the sample clustering based on DMPs. Bar diagram shows the gain in hypermethylation  
 958 in DMPs. **d.** Venn diagram showing the overlap between DMPs and age-correlated CpGs.  
 959 20973 DMPs are age-correlated. Distribution of CpG features among these 20973 age-  
 960 correlated DMPs. **e.** Bar plot shows gain in hypermethylation in age-correlated DMPs. **f.**  
 961 Genes associated with age-correlated hypermethylated DMPs were overlapped with  
 962 STAT3 shRNA mRNA-seq in fetal chondrocytes, putative binding targets in fetal  
 963 chondrocytes and fetal vs adult mRNA-seq. Heatmaps show the expression profile  
 964 (STAT3 knocked-down fetal chondrocytes and fetal vs adult chondrocytes) of the 8  
 965 genes. P-values are calculated using 2-tailed Student's t test. Mean with standard  
 966 deviation is plotted.

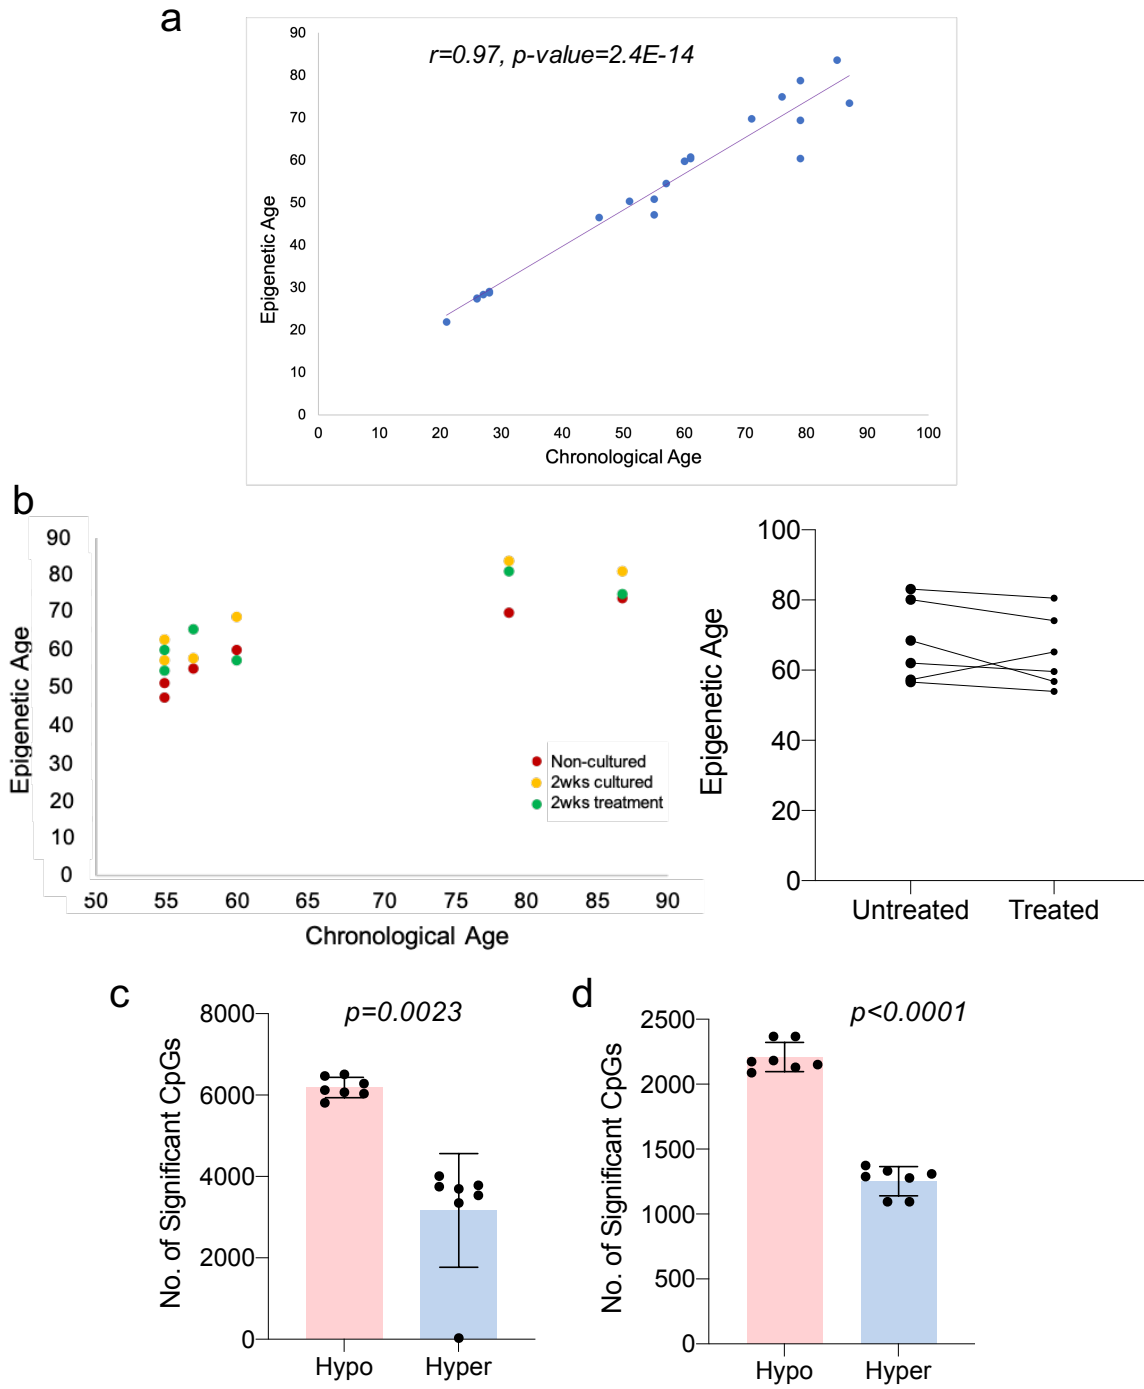

967  
968  
969  
970  
971  
972  
973



974 **Figure 5.** A novel epigenetic clock for adult chondrocytes. **a.** Epigenetic clock for adult  
975 chondrocytes shows high correlation between epigenetic age and chronological age. **b.**  
976 Administration of a small molecule STAT3 agonist to adult chondrocytes for 2 weeks  
977 lowers epigenetic age. **c.** Differentially methylated CpGs between 2wks cultured treated  
978 and untreated samples show global gain in hypomethylation **d.** Age-correlated  
979 differentially methylated CpGs between 2wks cultured treated and untreated samples  
980 show global gain in hypomethylation. P-values are calculated using 2-tailed Student's t  
981 test. Mean with standard deviation is plotted.

982  
983  
984  
985  
986  
987  
988  
989  
990  
991  
992  
993  
994  
995  
996  
997  
998  
999

1000  
1001  
1002  
1003  
1004  
1005  
1006  
1007  
1008  
1009  
1010  
1011  
1012  
1013  
1014  
1015  
1016  
1017  
1018

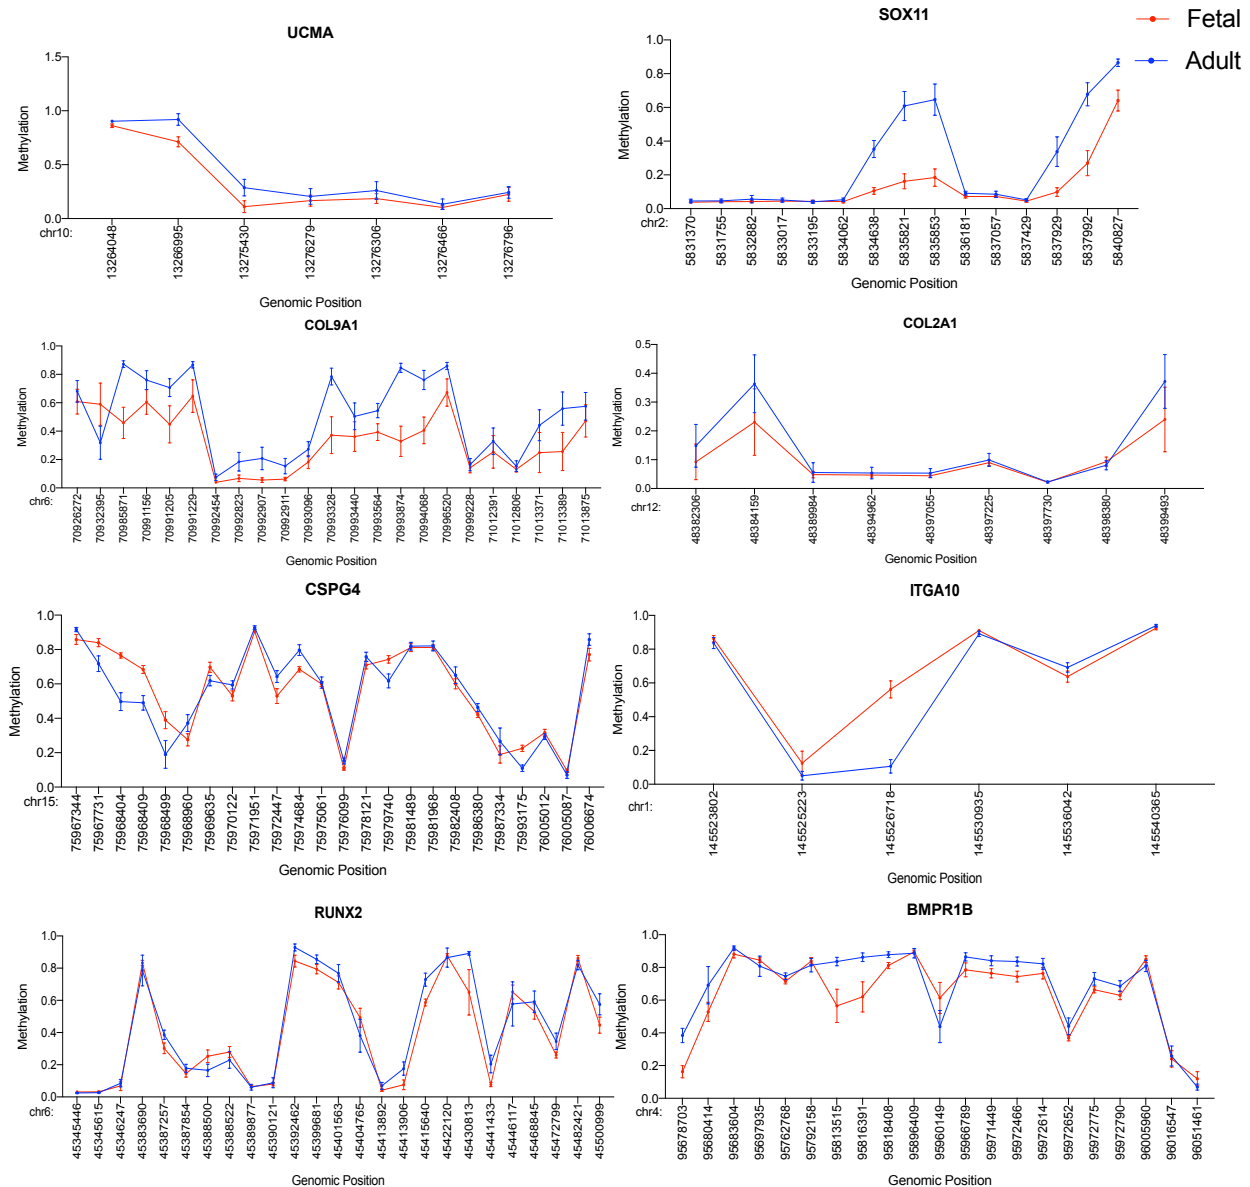

1019  
1020

1021 **Figure S1.** Gain of methylation in age-correlated CpGs associated with chondrogenic  
1022 genes. Scatterplot showing the methylation level and genomic coordinates for all age-  
1023 correlated CpGs associated with the chondrogenic genes. Mean with standard deviation  
1024 is plotted.

1025  
1026  
1027  
1028  
1029  
1030

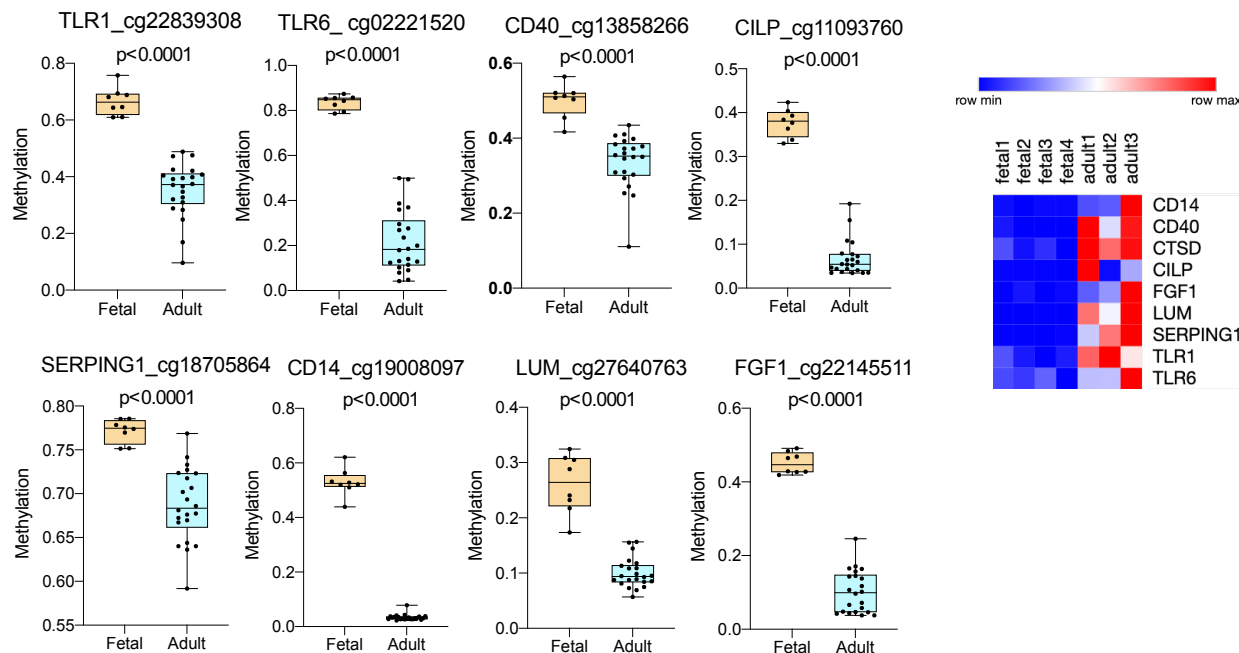

1031  
 1032  
 1033 **Figure S2.** Loss of methylation in age-correlated CpGs. Boxplot showing methylation  
 1034 level of representative age-correlated CpGs (i.e., CpGs with highest hypomethylation  
 1035 change across age). Transcriptomic profile for the genes in fetal and adult chondrocytes  
 1036 is also shown. Hinges of all boxplots extend from the 25th to 75th percentiles. The line in  
 1037 the middle of the box is plotted at the median. P-values are calculated using 2-tailed  
 1038 Student's t test.

1039  
 1040  
 1041  
 1042  
 1043  
 1044  
 1045  
 1046  
 1047  
 1048  
 1049  
 1050  
 1051  
 1052  
 1053  
 1054  
 1055  
 1056  
 1057  
 1058

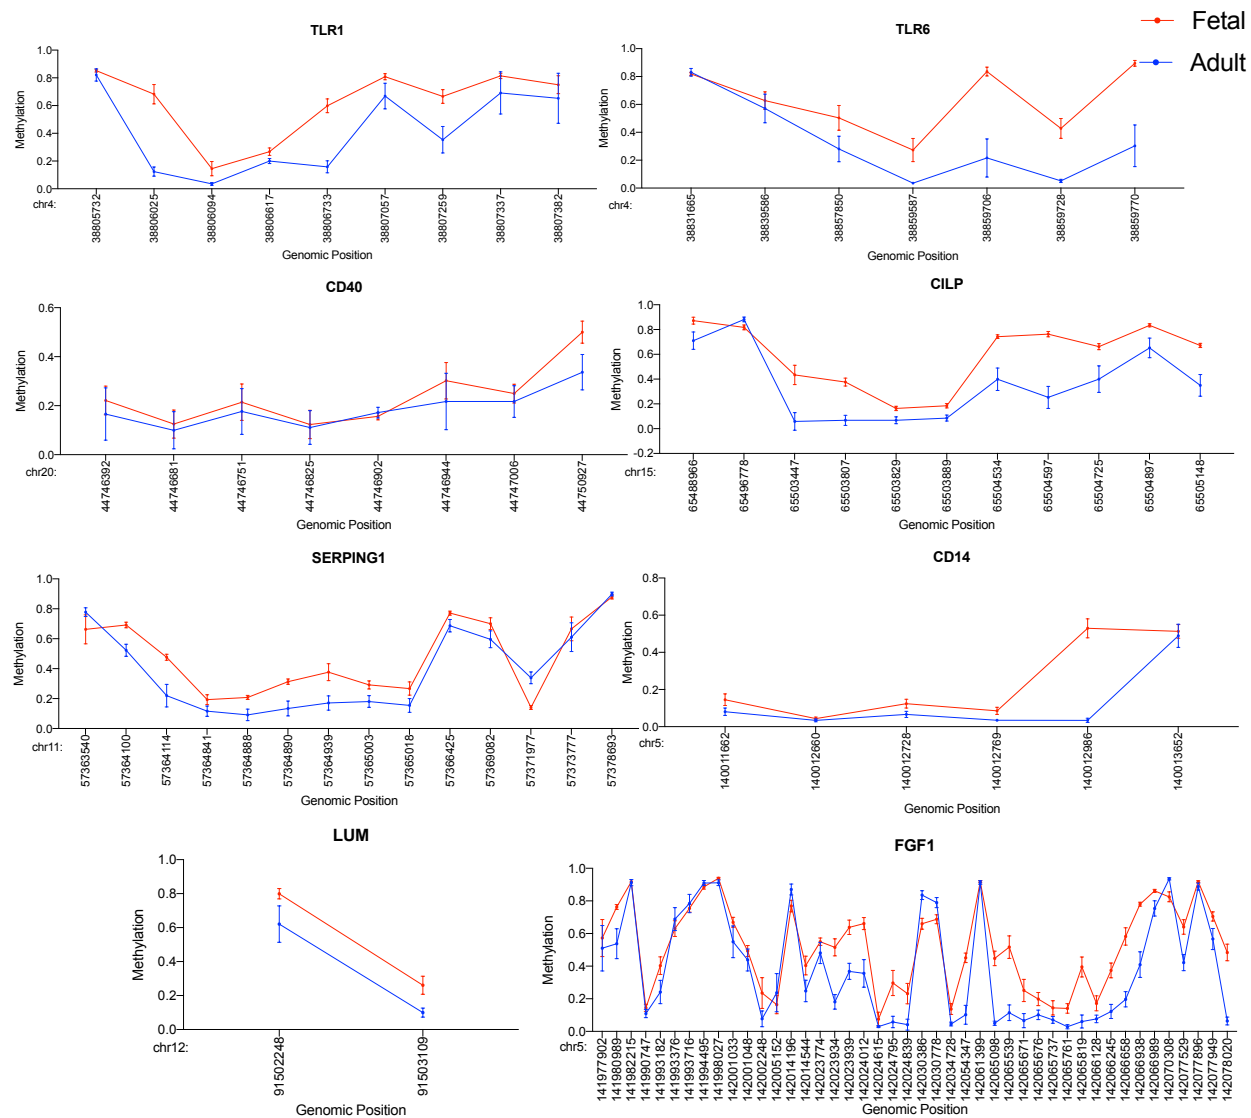

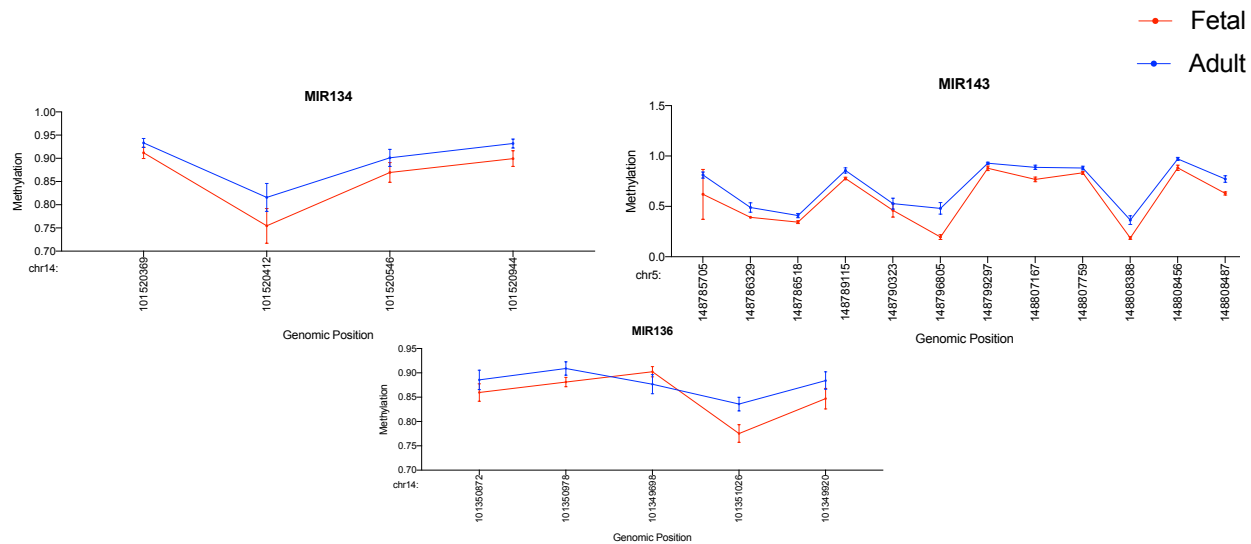

1074  
1075  
1076  
1077  
1078  
1079  
1080  
1081  
1082  
1083  
1084  
1085  
1086  
1087  
1088  
1089  
1090  
1091  
1092  
1093  
1094  
1095  
1096  
1097  
1098  
1099  
1100  
1101  
1102  
1103  
1104  
1105

**Figure S4.** Gain of methylation in age-correlated CpGs associated with miRNAs. Scatterplot showing the methylation level and genomic coordinates for all age-correlated CpGs associated with the miRNAs. Mean with standard deviation is plotted.

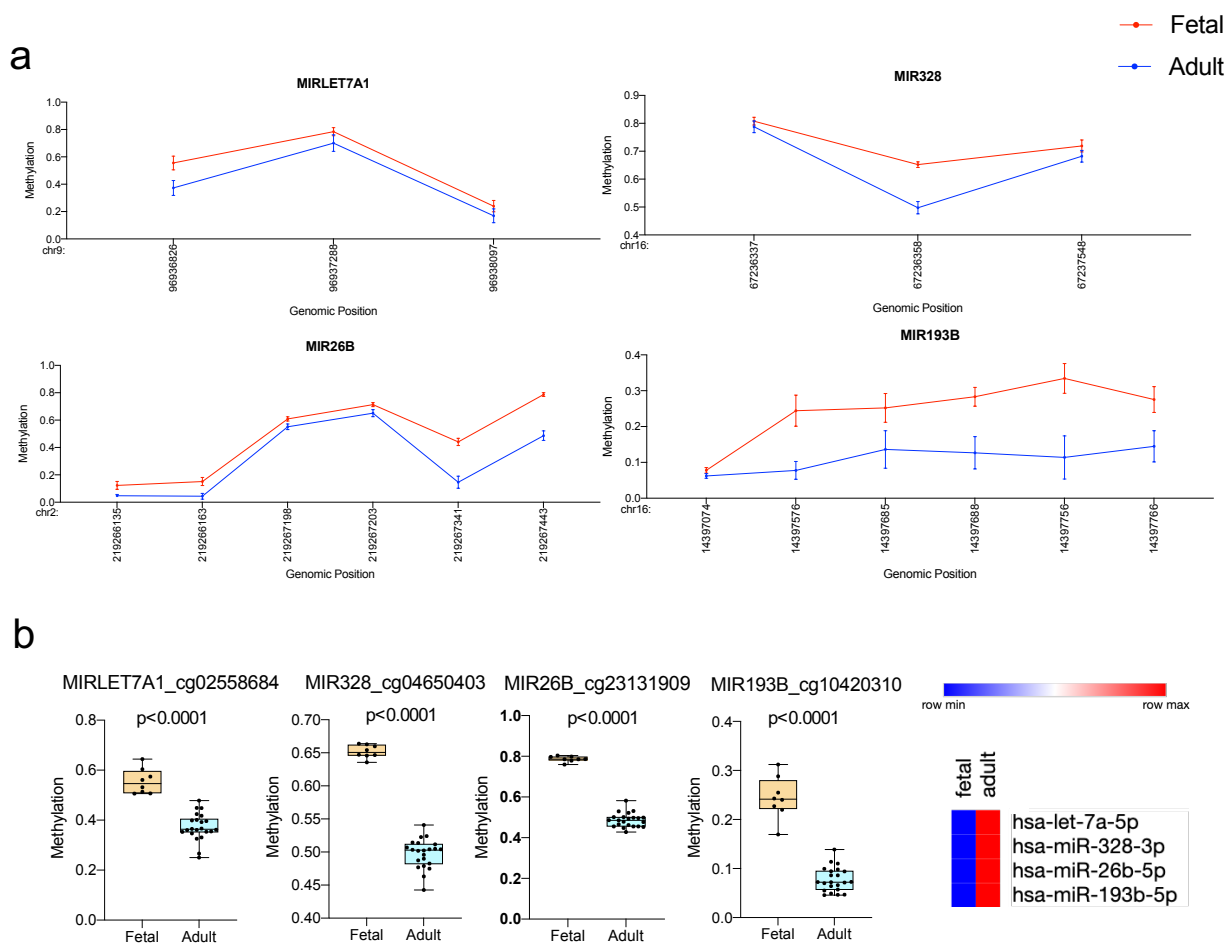

1106  
 1107 **Figure S5.** Loss of methylation in age-correlated CpGs associated with miRNAs. **a.**  
 1108 Scatterplot showing the methylation level and genomic coordinates for all age-correlated  
 1109 CpGs associated with the miRNAs. Mean with standard deviation is plotted. **b.** Boxplot  
 1110 showing methylation level of representative age-correlated CpGs (i.e., CpGs with highest  
 1111 hypomethylation change across age). miRNA expression profile in fetal and adult  
 1112 chondrocytes is also shown. Hinges of all boxplots extend from the 25th to 75th  
 1113 percentiles. The line in the middle of the box is plotted at the median. P-values are  
 1114 calculated using 2-tailed Student's t test.

1115  
 1116  
 1117  
 1118  
 1119  
 1120  
 1121  
 1122  
 1123

1124  
1125  
1126  
1127  
1128  
1129  
1130  
1131  
1132  
1133  
1134  
1135  
1136  
1137  
1138  
1139  
1140  
1141  
1142  
1143  
1144  
1145  
1146  
1147  
1148  
1149  
1150  
1151  
1152  
1153  
1154  
1155  
1156  
1157  
1158  
1159  
1160  
1161  
1162  
1163  
1164  
1165  
1166  
1167  
1168

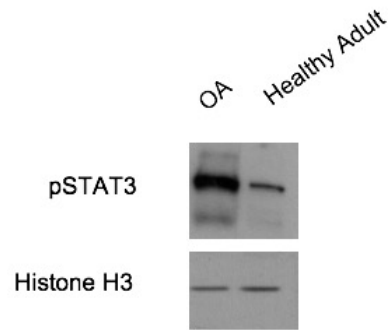

**Figure S6.** Active STAT3 is highly expressed in osteoarthritic chondrocytes as compared to healthy adult chondrocytes.

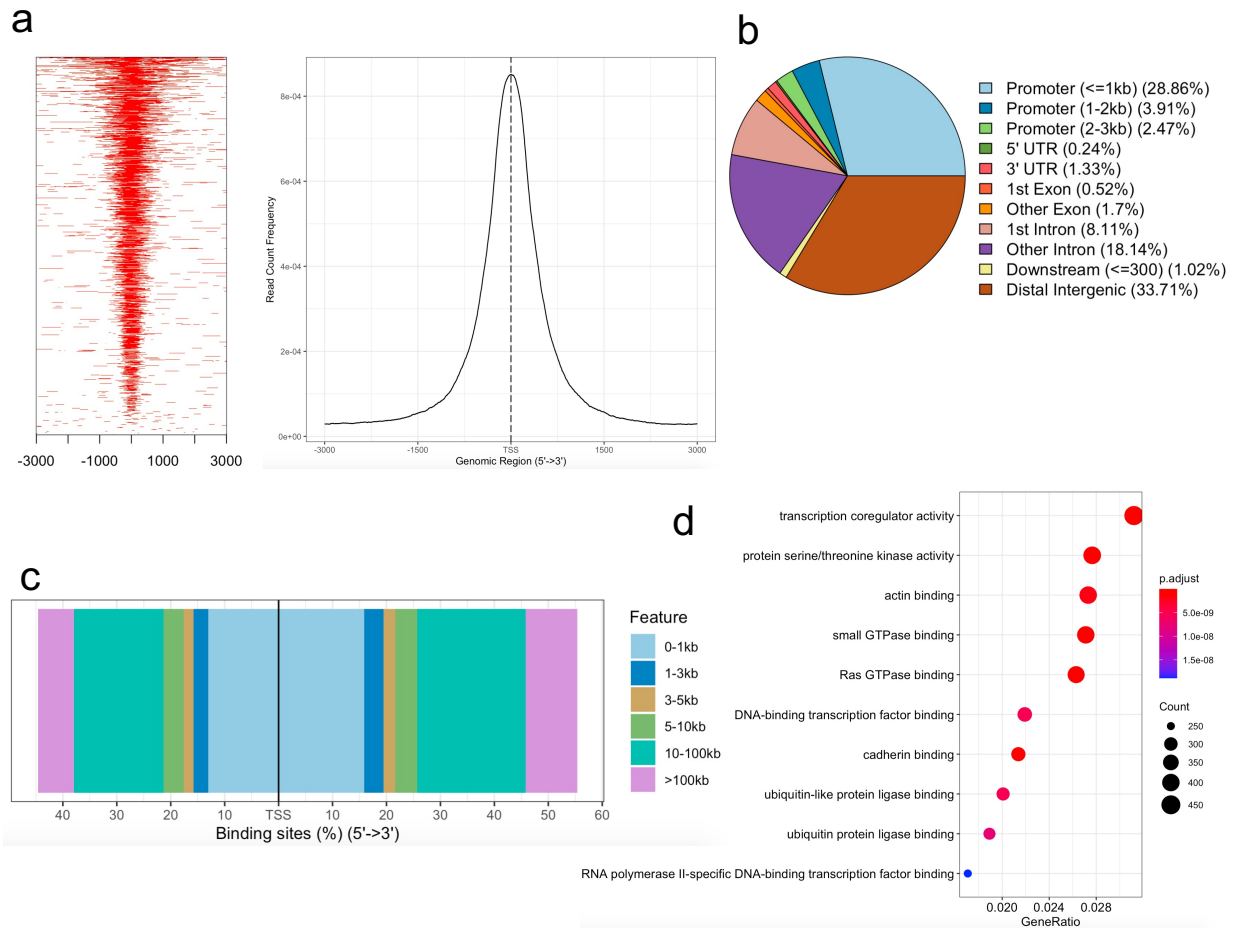

1169  
1170  
1171  
1172  
1173  
1174  
1175  
1176  
1177  
1178  
1179  
1180  
1181  
1182  
1183  
1184  
1185  
1186  
1187  
1188  
1189

**Figure S7.** ATAC-Seq for fetal chondrocyte **a.** Heatmap showing enrichment of reads and distribution of peaks across  $\pm 3\text{kb}$  of TSS. **b,c.** Pie chart and bar plot showing the distribution of genomic features. **d.** Functional enrichment of target genes. P-values were adjusted using Benjamini-Hochberg correction method.



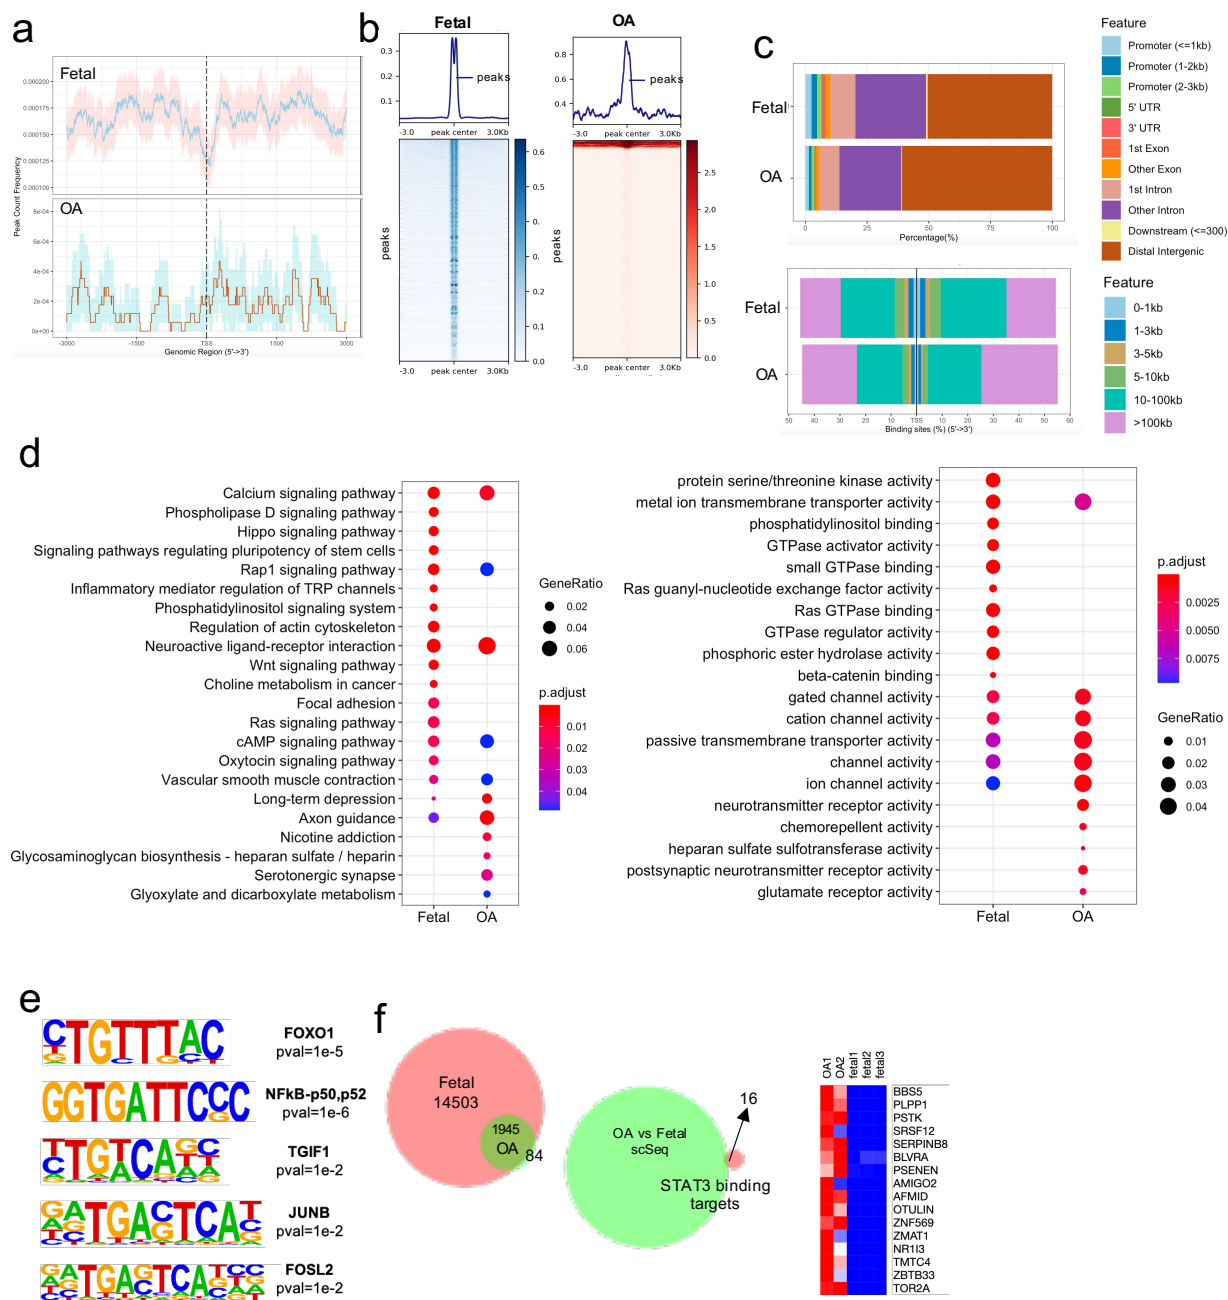

1190  
1191  
1192  
1193  
1194  
1195  
1196  
1197

1198 **Figure S8.** STAT3 binding targets in disease. OA=osteoarthritis **a.** Distribution of peak  
1199 count frequency across  $\pm 3$ kb of TSS. Confidence intervals shown by the shadows  
1200 following each curve were estimated by bootstrap method using 500 iterations **b.**  
1201 Heatmap showing enrichment of reads in peak summits. **c.** Bar plot showing the  
1202 distribution of genomic features for peaks in fetal and osteoarthritic chondrocytes. **d.**  
1203 Gene enrichment analysis of putative STAT3 target genes. P-values were adjusted using  
1204 Benjamini-Hochberg correction method. **e.** DNA motif enrichment analysis for putative  
1205 STAT3 binding targets. Binomial distribution was used to score motifs. **f.** Venn diagram  
1206 showing the overlap between putative STAT3 targets in fetal and osteoarthritic  
1207 chondrocytes. 84 exclusive fetal chondrocyte targets were overlapped with OA vs fetal  
1208 single cell sequencing data. Heatmap shows the expression profile of the 16 final targets  
1209 obtained for osteoarthritic chondrocytes.

1210  
1211  
1212  
1213  
1214  
1215  
1216  
1217  
1218  
1219  
1220  
1221  
1222  
1223  
1224  
1225  
1226  
1227  
1228  
1229  
1230  
1231  
1232  
1233  
1234  
1235  
1236  
1237

1238  
1239  
1240  
1241  
1242  
1243  
1244  
1245  
1246  
1247  
1248  
1249  
1250  
1251  
1252  
1253  
1254  
1255  
1256  
1257  
1258  
1259  
1260

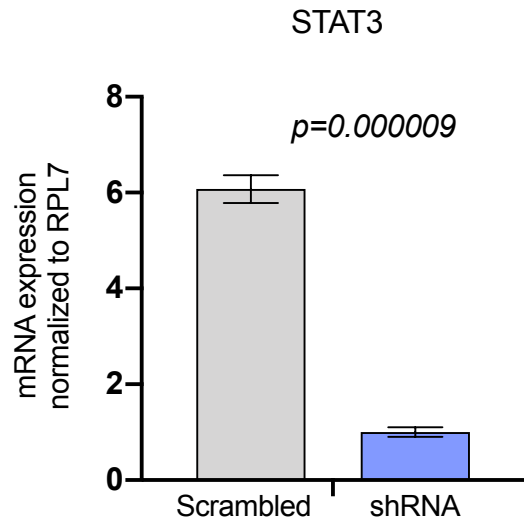

**Figure S9.** qRT-PCR data analysis for STAT3 in scrambled and STAT3 shRNA fetal chondrocytes. Statistical analysis was performed using 2-tailed Student's t test in GraphPad Prism 9.0 and p-value <0.05 was considered as statistically significant. Mean with standard deviation is plotted.
